# Supplementary material for: UpToDate adherence to GRADE criteria for strong recommendations: an analytical survey
Source: PubMed Central journal article supplement — BMJ Open. 2017 Nov 16;7(11):e018593. doi: 10.1136/bmjopen-2017-018593 (PMC5701989; doi:10.1136/bmjopen-2017-018593), 2017-11-16
Supplement: bmjopen-2017-018593.draft_revisions.pdf [file bmjopen-2017-018593.draft_revisions.pdf]

# BMJ Open

BMJ Open is committed to open peer review. As part of this commitment we make the peer review history of every article we publish publicly available.

When an article is published we post the peer reviewers' comments and the authors' responses online. We also post the versions of the paper that were used during peer review. These are the versions that the peer review comments apply to.

The versions of the paper that follow are the versions that were submitted during the peer review process. They are not the versions of record or the final published versions. They should not be cited or distributed as the published version of this manuscript.

BMJ Open is an open access journal and the full, final, typeset and author-corrected version of record of the manuscript is available on our site with no access controls, subscription charges or pay-per-view fees (<http://bmjopen.bmj.com>).

If you have any questions on BMJ Open's open peer review process please email [editorial.bmjopen@bmj.com](mailto:editorial.bmjopen@bmj.com)

# BMJ Open

## UpToDate adherence to GRADE criteria for strong recommendations: an analytic survey

|                                 |                                                                                                                                                                                                                                                                                                                                                                                                                                                                                                                                                                                                                                                                                                                                                                                                                                                                                                                                                                                                                                                                                                                                                                                                                                                                                                            |
|---------------------------------|------------------------------------------------------------------------------------------------------------------------------------------------------------------------------------------------------------------------------------------------------------------------------------------------------------------------------------------------------------------------------------------------------------------------------------------------------------------------------------------------------------------------------------------------------------------------------------------------------------------------------------------------------------------------------------------------------------------------------------------------------------------------------------------------------------------------------------------------------------------------------------------------------------------------------------------------------------------------------------------------------------------------------------------------------------------------------------------------------------------------------------------------------------------------------------------------------------------------------------------------------------------------------------------------------------|
| Journal:                        | <i>BMJ Open</i>                                                                                                                                                                                                                                                                                                                                                                                                                                                                                                                                                                                                                                                                                                                                                                                                                                                                                                                                                                                                                                                                                                                                                                                                                                                                                            |
| Manuscript ID                   | bmjopen-2017-018593                                                                                                                                                                                                                                                                                                                                                                                                                                                                                                                                                                                                                                                                                                                                                                                                                                                                                                                                                                                                                                                                                                                                                                                                                                                                                        |
| Article Type:                   | Research                                                                                                                                                                                                                                                                                                                                                                                                                                                                                                                                                                                                                                                                                                                                                                                                                                                                                                                                                                                                                                                                                                                                                                                                                                                                                                   |
| Date Submitted by the Author:   | 10-Jul-2017                                                                                                                                                                                                                                                                                                                                                                                                                                                                                                                                                                                                                                                                                                                                                                                                                                                                                                                                                                                                                                                                                                                                                                                                                                                                                                |
| Complete List of Authors:       | <p>Agoritsas, Thomas; University Hospitals of Geneva, Division of General Internal Medicine &amp; Division of Clinical Epidemiology; McMaster University Faculty of Health Sciences, Department of Health Research Methods, Evidence, and Impact</p> <p>Merglen, Arnaud; University Hospitals of Geneva, Division of General Pediatrics</p> <p>Heen, Anja; Innlandet Hospital Trust-division Gjøvik, Department of Internal Medicine</p> <p>Kristiansen, Annette; Inland hospital trust, Internal medicine, Gjøvik</p> <p>Neumann, Ignacio; Pontificia Universidad Catolica de Chile, Department of Internal Medicine; McMaster University, Department of Health Research Methods, Evidence, and Impact,</p> <p>Brito, Juan; Mayo Clinic Minnesota, Department of Medicine and Knowledge and Evaluation Research Unit,</p> <p>Brignardello-Petersen, Romina; McMaster University, Department of Health Research Methods, Evidence, and Impact</p> <p>Alexander, Paul; McMaster University, Department of Health Research Methods, Evidence, and Impact</p> <p>Rind, David; Institute for Clinical and Economic Review</p> <p>Vandvik, Per; Norwegian Knowledge Centre for the Health Services,</p> <p>Guyatt, Gordon; McMaster University, Department of Health Research Methods, Evidence, and Impact</p> |
| <b>Primary Subject Heading</b>: | Evidence based practice                                                                                                                                                                                                                                                                                                                                                                                                                                                                                                                                                                                                                                                                                                                                                                                                                                                                                                                                                                                                                                                                                                                                                                                                                                                                                    |
| Secondary Subject Heading:      | Epidemiology                                                                                                                                                                                                                                                                                                                                                                                                                                                                                                                                                                                                                                                                                                                                                                                                                                                                                                                                                                                                                                                                                                                                                                                                                                                                                               |
| Keywords:                       | Clinical Practice Guidelines, Strength of Recommendations, Quality of the Evidence, Clinical Decision Making, Evidence-Based Medicine                                                                                                                                                                                                                                                                                                                                                                                                                                                                                                                                                                                                                                                                                                                                                                                                                                                                                                                                                                                                                                                                                                                                                                      |
|                                 |                                                                                                                                                                                                                                                                                                                                                                                                                                                                                                                                                                                                                                                                                                                                                                                                                                                                                                                                                                                                                                                                                                                                                                                                                                                                                                            |

SCHOLARONE™  
Manuscripts

1  
2  
3  
4 **UpToDate adherence to GRADE criteria for strong recommendations: an**  
5  
6 **analytic survey**  
7  
8

9 Thomas Agoritsas, MD, PhD <sup>1,2</sup>

10 Arnaud Merglen, MD, MSc <sup>3</sup>

11 Anja Fog Heen, MD <sup>4</sup>

12 Annette Kristiansen, MD, PhD <sup>4</sup>

13 Ignacio Neumann, MD, PhD <sup>2,5</sup>

14 Juan P Brito, MD, MSc <sup>6</sup>

15 Romina Brignardello-Petersen, DDS, MSc, PhD <sup>2,7</sup>

16 Paul E Alexander, MSc, PhD <sup>2</sup>

17 David M Rind, MD, MSc <sup>8</sup>

18 Per O. Vandvik, MD, PhD <sup>4,9</sup>

19 Gordon H Guyatt, MD, MSc <sup>2</sup>

20  
21  
22  
23  
24  
25  
26  
27  
28  
29  
30  
31  
32  
33  
34  
35  
36  
37  
38  
39  
40  
41 **Affiliations:**  
42

43 <sup>1</sup> Division of General Internal Medicine & Division of Clinical Epidemiology, University Hospitals of  
44 Geneva, Geneva, Switzerland.  
45

46 <sup>2</sup> Department of Health Research Methods, Evidence, and Impact, McMaster University, Faculty of Health  
47 Sciences, Hamilton, Ontario, Canada  
48

49 <sup>3</sup> Division of General Pediatrics, University Hospitals of Geneva & Faculty of Medicine, University of  
50 Geneva, Geneva, Switzerland.  
51

52 <sup>4</sup> Department of Internal Medicine, Innlandet Hospital Trust-division Gjøvik, Norway  
53  
54  
55  
56  
57  
58  
59  
60

1  
2  
3  
4  
5  
6  
7  
8  
9  
10  
11  
12  
13  
14  
15  
16  
17  
18  
19  
20  
21  
22  
23  
24  
25  
26  
27  
28  
29  
30  
31  
32  
33  
34  
35  
36  
37  
38  
39  
40  
41  
42  
43  
44  
45  
46  
47  
48  
49  
50  
51  
52  
53  
54  
55  
56  
57  
58  
59  
60

<sup>5</sup> Department of Internal Medicine, Pontificia Universidad Catolica de Chile, Santiago, Chile

<sup>6</sup> Division of Endocrinology, Diabetes, Metabolism and Nutrition, Department of Medicine and Knowledge and Evaluation Research Unit, Mayo Clinic, Rochester, USA

<sup>7</sup> Faculty of Dentistry, University of Chile, Chile.

<sup>8</sup> Institute for Clinical and Economic Review, Boston, MA, USA

<sup>9</sup> Institute of Health and Society, Faculty of Medicine, University of Oslo, Norway

\* **Correspondence to:** Thomas Agoritsas, MD, PhD ([thomas.agoritsas@gmail.com](mailto:thomas.agoritsas@gmail.com))

Division of General Internal Medicine & Division of Clinical Epidemiology

Department Internal Medicine, Rehabilitation and Geriatrics (DMIRG)

University Hospitals of Geneva, Rue Gabrielle-Perret-Gentil 4,

1211 Genève 14, Switzerland

Phone: +41 79 55 34 543

**Keywords:** Clinical Practice Guidelines, Strength of Recommendations, Quality of the Evidence, Clinical Decision Making, Evidence-Based Medicine.

**Abstract:** 285 words / **Manuscript:** 2955 words

**Tables:** 5 / **Supplementary Files:** 2

## ABSTRACT

### Introduction

UpToDate is widely used by clinicians worldwide and includes more than 9,400 recommendations that apply the GRADE framework. GRADE guidance warns against strong recommendations when certainty of the evidence is low or very low (discordant recommendations), but has identified five paradigmatic situations in which discordant recommendations may be justified.

### Objectives

Our objective was to document the strength of recommendations in UpToDate and assess the frequency and appropriateness of discordant recommendations.

### Design

Analytic survey of all recommendations in UpToDate

### Methods

We identified all GRADE recommendations in UpToDate, and examined their strength (strong or weak) and certainty of the evidence (high, moderate, or low certainty). We identified all discordant recommendations as of January 2015, and pairs of reviewers independently classified them either into one of the five appropriate paradigms or into one of three categories inconsistent with GRADE guidance.

### Results

UpToDate included 9451 GRADE recommendations, of which 6501 (68.8%) were formulated as weak recommendations and 2950 (31.2%) as strong. Among the strong,

1  
2  
3 844 (28.6%) were based on high certainty in effect estimates, 1,740 (59.0%) on  
4  
5 moderate certainty, and 366 (12.4%) on low certainty. Of the 349 discordant  
6  
7 recommendations 204 (58.5%) were judged appropriate (consistent with one of the five  
8  
9 paradigms); we classified 47 (13.5%) as good practice statements; 38 (10.9%)  
10  
11 misclassified the evidence as low certainty when it was at least moderate; and 60  
12  
13 (17.2%) warranted a weak rather than a strong recommendation.  
14  
15

## 16 17 18 **Conclusion**

19  
20 The proportion of discordant recommendations in UpToDate is small, and the  
21  
22 proportion that is truly problematic (strong recommendations that would best have  
23  
24 been weak) very small. Clinicians should nevertheless be cautious, and look for clear  
25  
26 explanations - in UpToDate and elsewhere - when guidelines offer strong  
27  
28 recommendations based on low certainty evidence.  
29  
30  
31  
32

### 33 **Strengths and limitations of this study**

- 34 - We assessed the strength of recommendations in the largest known sample of  
35  
36 recommendations using GRADE (N=9451) addressing a wide array of clinical fields.
- 37 - We used a taxonomy to appraise discordant recommendations that has been  
38  
39 successfully implemented in two prior assessments of clinical practice guidelines.
- 40 - We based our assessment solely on information published in UpToDate, while  
41  
42 authors of the topics may have considered other factors in deciding to issue a  
43  
44 discordant recommendation.
- 45 - UpToDate topics are narrative in nature and do not include formal summary of  
46  
47 finding tables. As a result, the comparators were often not clearly stated, which may  
48  
49 have influenced the reviewers' inferences about the discordant recommendations.  
50  
51  
52  
53  
54  
55  
56  
57  
58  
59  
60

## INTRODUCTION

To ensure that patients receive optimal care, consistent with their values and preferences, clinicians need trustworthy recommendations based on transparent ratings of certainty of evidence and strength of recommendations.<sup>1</sup> The widely adopted GRADE system (Grading of Recommendations Assessment, Development and Evaluation) offers a systematic and transparent framework to rate certainty (also referred to as quality or confidence) of evidence and to move from evidence to recommendations.<sup>2-5</sup>

Using GRADE, guideline-makers issue strong recommendations when they are confident that the desirable consequences clearly outweigh the undesirable consequences.<sup>6 7</sup> Conversely they should issue weak (also called conditional) when the balance of desirable and undesirable consequences between alternatives is close, the certainty in evidence is low, uncertainty or variability in patients' values and preferences is large, or cost-effectiveness is questionable.<sup>6</sup> Strong recommendations represent "just do it" recommendations applicable to almost all patients; weak recommendations are applicable to the majority of patients and include preference-sensitive decisions that require clinicians to ensure, through shared-decision making, that patients' choices are congruent with their values.<sup>8</sup>

GRADE views strong recommendations in the face of low certainty evidence (we will refer to such situations as *discordant recommendations*) as questionable, and often inappropriate. Some guidelines have a clear surfeit of discordant recommendations. For example, of 456 recommendations in 116 WHO guidelines, 160 (35%) proved discordant.<sup>9 10</sup> Similarly 121 of 357 (34%) recommendations in 17 Endocrine Society Guidelines proved discordant.<sup>11 12</sup>

Though discordant recommendations often represent a violation of GRADE guidance,

1  
2  
3 this is not always the case. GRADE has identified 5 seldom-occurring paradigmatic  
4  
5 situations in which a strong recommendation is warranted despite low certainty in the  
6  
7 evidence (Table 1).<sup>6 13</sup> Further, there is more than one explanation for an apparent  
8  
9 violation of GRADE guidance (a discordant recommendation that fails to meet one of  
10  
11 these criteria). First, the discordant recommendation may actually represent a good  
12  
13 practice statement, in which indirect evidence justifies an inference that the  
14  
15 recommended management option is far superior to the alternative.<sup>14</sup> Second, the panel  
16  
17 may have misclassified the certainty of the evidence (it may actually be moderate or  
18  
19 high). Third, and most concerning, the optimal management option is in fact value and  
20  
21 preference-sensitive and the panel should have issued a weak recommendation (Table  
22  
23 2).<sup>6 13</sup>

24  
25  
26  
27  
28 Of the 160 discordant recommendations in the WHO guideline, 73 (46%) fell into the  
29  
30 most concerning category of those that warranted a weak recommendation.<sup>9 10</sup> Of the  
31  
32 121 discordant recommendations in the Endocrine Society guidelines, 33 (27%)  
33  
34 warranted a weak recommendation.<sup>11</sup> These results demonstrate that excessive use of  
35  
36 strong recommendations in the face of low certainty evidence is common and  
37  
38 concerning.

39  
40  
41  
42  
43 UpToDate ([www.uptodate.com](http://www.uptodate.com))<sup>15</sup> is an electronic medical textbook that uses GRADE  
44  
45 and includes over 9,400 GRADE recommendations<sup>15 16</sup>. UpToDate has instituted  
46  
47 intensive training in GRADE methods for their in-house deputy editors who are largely  
48  
49 responsible for UpToDate material. Training involves regular large and small group  
50  
51 seminars, and individual feedback from in-house methodologists.

52  
53  
54  
55 Because it is enormously popular and used by clinicians worldwide, and despite the  
56  
57 training in GRADE that their deputy editors undergo, the possibility that UpToDate is  
58  
59  
60



1  
2  
3 issuing misleading strong recommendations on the basis of low certainty evidence  
4  
5 constitutes a matter of concern. Therefore, we set out to determine, among all GRADE  
6  
7 recommendations in UpToDate, the distribution of strong and weak recommendations,  
8  
9 the proportion of discordant recommendations, and to characterize discordant  
10  
11 recommendations based on the taxonomy described above (Table 1 & 2).  
12  
13  
14  
15  
16  
17  
18  
19  
20  
21  
22  
23  
24  
25  
26  
27  
28  
29  
30  
31  
32  
33  
34  
35  
36  
37  
38  
39  
40  
41  
42  
43  
44  
45  
46  
47  
48  
49  
50  
51  
52  
53  
54  
55  
56  
57  
58  
59  
60

## METHODS

### Design and data source

We conducted an analytic survey of all GRADE recommendations included in UpToDate. We collaborated with UpToDate to identify all 9451 included in UpToDate as of June 2014, and determined their strength (strong or weak), and their certainty in evidence (high, moderate, or low – UpToDate does not use GRADE’s “very low” category). We abstracted the title of each topic, as well as their corresponding clinical domains and age-group populations. From this database, we identified all discordant recommendations included in UpToDate as of January 2015.

### Data abstraction on the discordant recommendations

UpToDate topics summarizing the evidence and rationale supporting the recommendations are mostly in narrative formats, and do not provide summary of finding tables or evidence profiles.<sup>17</sup> To assess the appropriateness of discordant recommendations according to the paradigmatic situation defined in the GRADE framework, we therefore standardized data abstraction to collect relevant information from the main text (detailed instruction [Supplementary File 1](#)).

Eight reviewers working in six pairs – all working actively as clinicians and proficient in GRADE methodology – performed data abstraction and assessed the appropriateness of discordant recommendations in duplicate. They abstracted the following information related to each discordant recommendation:

- Patient population (clinical field and age group);
- Type of intervention (drug, procedure, device, etc.) and type of comparator

- (existing standard care, no intervention, alternative intervention, etc.);
- The clarity of the comparator, classified as (i) clearly and explicitly stated; (ii) not clearly and explicitly stated, but obvious; (iii) not clearly and explicitly stated or obvious, but relatively easy to infer; (iv) not at all clear - very uncertain;
  - Outcomes: whether there was an explicit statement on mortality as well as the balance of benefits and harms;
  - Whether there was an explicit statement on the relative importance of outcomes and/or on patients' values and preferences in making the trade-offs between alternative courses of action;
  - Whether issues of cost or resources were explicitly discussed;
  - The evidence supporting the recommendation, both for systematic reviews and primary study designs (randomized trials, observational studies, etc.)
  - Whether the evidence summary suggested large effects in critical outcomes, or that indirect evidence, not incorporated in the grading, seemed to drive the recommendation.

Based on this abstracted information, each reviewer independently classified each of the discordant recommendations as either consistent with one of the five previously identified optimal categories for discordant recommendations (Table 1)<sup>6 10 13</sup> or in one of three categories in which we judged discordant recommendations to be inconsistent with GRADE guidance (Table 2): (i) good practice statements; (ii) a misclassification of the evidence – the evidence warranted moderate or high certainty rather than low; or (iii) uncertainty in the estimates of effect would best lead to a weak recommendation. We assessed agreement for whether recommendations were appropriate (vs. inappropriate) according to GRADE guidance using the chance-corrected kappa statistic.

1  
2  
3 The reviewers resolved all disagreements by discussion or through referral to an  
4 additional reviewer.  
5  
6  
7

### 8 **Data analysis and reporting** 9

10  
11 We abstracted data in an MS Excel database (v. 14.4) with pre-specified response  
12 categories whenever possible, and exported in SPSS (v. 22.0) for analysis. We analyzed  
13 the recommendation and sample characteristics as natural frequencies and proportions.  
14  
15  
16  
17  
18  
19  
20  
21  
22  
23  
24  
25  
26  
27  
28  
29  
30  
31  
32  
33  
34  
35  
36  
37  
38  
39  
40  
41  
42  
43  
44  
45  
46  
47  
48  
49  
50  
51  
52  
53  
54  
55  
56  
57  
58  
59  
60

## RESULTS

The 2971 topics in UpToDate that included GRADE recommendations covered a broad spectrum of clinical fields and health care, including 16.1% in oncology, 49.2% topics in other internal medicine specialties or primary care, and 12.5% in pediatrics. These topics included 9451 GRADE recommendations, of which 6501 (68.8%) were formulated as weak recommendations and 2950 (31.2%) as strong recommendations (Table 3). The proportion of strong recommendations varied greatly across clinical fields, ranging from 5.8% (in dermatology) to 42.7% (in cardiovascular medicine) (Supplementary File 2).

Of the 2950 strong recommendations, 844 (28.6%) were based on high certainty evidence, 1740 (59.0%) on moderate certainty, and 366 (12.4%) were discordant strong recommendations based on low certainty evidence (Table 3). Because UpToDate is continuously updated, 17 recommendations were modified in strength and/or certainty between the time all 9451 recommendations were retrieved, and the time all topics were downloaded for abstraction, as of January 2015.<sup>15</sup> The final study cohort therefore comprised a total of 349 discordant recommendations.

The 349 discordant recommendations were issued across 274 individual topics in UpToDate (each including a range of one to five recommendations), and the topics addressed covered a broad spectrum of health care issues within each clinical field, (Supplementary File 2). Interventions included drugs (56.4% of recommendations), surgery (19.8%), medical devices (6.9%), diagnostic or screening tests (20.9%), and other behavioral or multi-disciplinary interventions (10.0%). These interventions were most often compared to another intervention or to standard of care (56.7%) and less often to no intervention or placebo (36.1%).

1  
2  
3 The 349 discordant recommendations represent 3.7% of all 9451 recommendations.  
4  
5 The proportion of discordant recommendations varied from 0% (e.g. in palliative care,  
6  
7 dermatology or for recommendations applying specifically to the elderly population), to  
8  
9 7.0% in pediatrics, 8.0% in infectious disease, and 10.9% in hematology (Supplementary  
10  
11 File 2).

### 12 13 14 15 16 **Evidence supporting the discordant recommendations**

17  
18 The comparator was clearly and explicitly stated in 73 (20.9%) of the 349  
19  
20 recommendations, not clearly but either obvious or relatively easy to infer in 230  
21  
22 (65.9%) and very uncertain in 46 (13.2%). The direction of the recommendation was  
23  
24 most often framed in favor of the intervention (78.5%) rather than against it (Table 4).

25  
26  
27  
28 The full-text of the UpToDate topic often provided a rationale supporting the  
29  
30 recommendation. An explicit statement on the balance of benefits and harms was  
31  
32 present in 92 (26.4%), and an implicit statement in 157 (45.0%), and no statement in  
33  
34 100 (28.7%). Explicit statements addressing the relative importance of outcomes  
35  
36 and/or on patients' values and preferences in making the trade-offs between  
37  
38 alternatives were present in 10 (2.9%) of the recommendations; they could be inferred  
39  
40 in 171 (49.0%), but not in the remaining 168 (48.1%) of discordant recommendations.  
41  
42 Cost or resources considerations were mentioned in 15 (4.3%). The evidence cited to  
43  
44 support each discordant recommendation varied substantially, with a median of 4  
45  
46 references cited, range from 0 to 33, with 45 (12.9%) of recommendations without any  
47  
48 citation. Observational studies dominated (203, 58.2%); 49 (14.0%) were supported by  
49  
50 a systematic review (Table 4).

### Appropriateness of the discordant recommendations

Kappa for the initial taxonomic judgment regarding whether the recommendation was appropriate or inappropriate according to GRADE guidance was 0.46 (moderate agreement). The two reviewers required consensus discussions for 43% of the discordant recommendations. Third party adjudication to determine the appropriate classification was required in 12 of the discordant recommendations (3.4%).

Reviewers judged 204 (58.5%) of the 349 discordant recommendations to be consistent with one of the five paradigmatic situations in which it is appropriate to offer discordant recommendations (Table 5). The most common paradigm was a “life-threatening or potentially catastrophic situation”, followed by “potential similar benefits, one clearly less risky or costly”, “potential catastrophic harm”, “uncertain benefits, certain harm”, and “established similar benefits, one potentially more risky or costly” (Table 5).

Reviewers judged 47 (13.5%) of the 349 discordant recommendations as “good practice statements”; 38 (10.9%) as a “misclassification of certainty (evidence warranted moderate or high certainty)”; and 60 (17.2%) as warranting a weak recommendation (see Table 5).

## DISCUSSION

Among 9451 GRADE recommendations in UpToDate, about two thirds were formulated as weak recommendations and the remainder as strong recommendations. Of all recommendations, only 3.7% (n=349) were strong recommendations based on low certainty in effect estimates (Table 3). Of these discordant recommendations, over half were consistent with one of the five paradigmatic situations in which it is appropriate to offer discordant recommendations; approximately 14% represented “good practice statements”; approximately 11% were based on a misclassification of certainty (evidence warranted moderate or high certainty), and approximately 17% were judged to warrant a weak recommendation (Table 5). The proportion of appropriate discordant recommendations varied across intervention types or clinical fields (Supplementary File 2). Although most topics in UpToDate provided a rationale to support the discordant recommendation, 29% lacked statements about benefits and harms and 13% did not provide citations, which points at potential areas of improvement for UpToDate related to standards for trustworthy guidelines.<sup>1</sup>

### Strengths and limitations

This study assessed the strength of recommendations in the largest known sample of recommendations developed using GRADE. Indeed, even large guidelines include a few hundred recommendations<sup>18</sup>, whereas UpToDate topics have one of the largest known coverage in clinical fields and included 9451 recommendations at the time of this assessment.

The taxonomy that we used has been successfully implemented in two prior studies of clinical guidelines<sup>10 11</sup> (see below: relation to prior work). Our reviewers were clinical



1  
2  
3 epidemiologists with an in-depth understanding of GRADE methodology and were  
4  
5 therefore well equipped to assess judgments on evidence and recommendations.  
6  
7 Despite these advanced skills, chance corrected kappa agreement on the  
8  
9 appropriateness of recommendations was moderate, albeit satisfactory (0.48).  
10  
11 Consensus discussions were needed for 43% of discordant recommendations, although  
12  
13 formal adjudication by third parties was required for only 12 discordant  
14  
15 recommendations (3.4%).  
16  
17

18  
19 The necessity for frequent consensus discussions reflects the substantial judgment  
20  
21 required in categorizing recommendations. This is in part due to the narrative nature of  
22  
23 UpToDate topics, which does not include formal summary of finding tables or evidence  
24  
25 profiles<sup>17</sup>, often discussing the evidence and rationale for several recommendations in a  
26  
27 free-text cross-referenced structure that sometimes omits statements regarding benefits  
28  
29 and harms, and lacks citations. A limitation of our study is that decisions were based  
30  
31 solely on information published in UpToDate, while authors of the topics may have  
32  
33 considered other factors.<sup>19</sup>  
34  
35  
36

37  
38 Another element contributing to the challenges in making categorizations is the clarity  
39  
40 of the comparison on which the recommendation applies. As in previous assessment in  
41  
42 guidelines<sup>9</sup>, the comparator was clearly and explicitly stated in only 73 (20.9%) of  
43  
44 discordant recommendations and was very uncertain in 46 (13.2%). When comparators  
45  
46 were not clear and explicit, reviewers' inferences may not always have been correct.<sup>19</sup>  
47  
48  
49

### 50 51 **Relation to previous work**

52  
53 Two prior studies provided a formal structured exploration of discordant  
54  
55 recommendations using the GRADE approach. An assessment of 357 recommendations  
56  
57  
58  
59  
60

1  
2  
3 in 17 Endocrine Society Guidelines found that 58% were strong, of which 59% were  
4  
5 based on low certainty.<sup>11 12</sup> Only 29% of discordant recommendations were consistent  
6  
7 with one of the 5 paradigmatic situations, whereas 36% were good practice statements,  
8  
9 4% were recommendations for additional research; 4% involved misclassification of the  
10  
11 certainty; and 27% had no compelling explanation and should have been weak  
12  
13 recommendations.<sup>11</sup>

14  
15  
16 A second study of 456 recommendations in 116 WHO guidelines using GRADE found  
17  
18 that 63% were strong, of which 56% were based on low (33%) or even very low (23%)  
19  
20 certainty.<sup>10</sup> Of the 160 discordant recommendations, only 15.6% were judged consistent  
21  
22 with GRADE guidance, while 18% were good practice statements, 21% involved  
23  
24 misclassification of the certainty, and 46% should have been weak rather than strong  
25  
26 recommendations.<sup>9</sup>

27  
28  
29 Our results contrast with these previous two studies. First, the proportion of weak  
30  
31 recommendations (more than two thirds of the total) was approximately 30% higher in  
32  
33 UpToDate than in WHO and Endocrine Society guidelines. This proportion was however  
34  
35 similar to the 9<sup>th</sup> edition ACCP guideline on Antithrombotic Therapy and Prevention of  
36  
37 Thrombosis, after it implemented GRADE.<sup>18 20</sup> Second, the proportion of inappropriate,  
38  
39 discordant recommendation was considerably lower. In particular, of the discordant  
40  
41 recommendations, the proportion that should have been weak was about 17%, rather  
42  
43 than 27% (Endocrine Society)<sup>11</sup> or 46% (WHO guidelines).<sup>9</sup>

44  
45  
46 A subsequent interview of panel members involved in the WHO guidelines highlighted  
47  
48 several reasons contributing to discordant recommendations. These included political  
49  
50 considerations around long-established practices, the need for funding and policy  
51  
52 formulation, or the fear of pushback from media.<sup>19</sup> Certain panel members also  
53  
54  
55  
56  
57  
58  
59  
60

1  
2  
3 expressed some skepticism about the value of making weak recommendations, or  
4 concerns they may be ignored<sup>19</sup>, although another study reported that WHO weak  
5 recommendations are frequently adopted in national policies (uptake of 61% for weak  
6 recommendations versus 82% for strong recommendations).<sup>21</sup> Finally, both financial  
7 and intellectual conflicts of interest among panel members may be an explanation for  
8 discordant recommendations; for instance, through the dominance by some panelists  
9 over inexperienced panel leader.<sup>19 22</sup> Of these explanations, the last – conflict of interest  
10 – is in our view the most likely to apply in the UpToDate context.  
11  
12  
13  
14  
15  
16  
17  
18  
19  
20  
21  
22

### 23 **Implications and conclusion**

24  
25  
26 For users of UpToDate, our results are generally, though not absolutely, reassuring. The  
27 proportion of discordant recommendations is very small – only 3.7% of all  
28 recommendations. Furthermore, of the three categories inconsistent with GRADE  
29 guidance – good practice statement, misclassification of the certainty, and evidence  
30 warranting a weak recommendation (Table 2) – the third is by far the most  
31 problematic.<sup>9</sup> Good practice statements are appropriate when indirect evidence that is  
32 difficult to collect and summarize warrants high certainty in the impact of a given  
33 intervention and when the balance benefits and harms is large.<sup>14</sup> Thus, in terms of  
34 implications for clinical practice, good practice statements have the same force as strong  
35 recommendation. Similarly with misclassification of certainty: since the certainty is  
36 actually moderate or high, a strong recommendation is appropriate. Recommendations  
37 that should have been weak instead of strong provide inappropriate “just do it” guidance  
38 for clinical practice, although they are actually preference-sensitive and should thus  
39 warrant shared-decision making.<sup>8</sup> Of the 349 discordant recommendations in UpToDate,  
40 only 60 fall in the category of inappropriate strong recommendations.  
41  
42  
43  
44  
45  
46  
47  
48  
49  
50  
51  
52  
53  
54  
55  
56  
57  
58  
59  
60

1  
2  
3 Thus, clinicians using UpToDate can anticipate that they will be misleadingly instructed  
4  
5 to take a “just do it” rather than an “it depends” approach to clinical decision making in  
6  
7 0.6% (6 of 1,000) UpToDate recommendations.<sup>15</sup> This seems close to a threshold in  
8  
9 which one might ignore the problem. Nevertheless, we would still encourage clinicians  
10  
11 to be alert to the possibility of an inappropriate strong recommendation – in UpToDate  
12  
13 or elsewhere – whenever the recommendation is based on low certainty evidence and  
14  
15 authors fail to provide an explicit rationale corresponding to one of the categories in  
16  
17 Table 1.  
18  
19

20  
21 A likely explanation for UpToDate’s success in avoiding inappropriate discordant  
22  
23 recommendations is the training and feedback that their deputy editors receive. For  
24  
25 organizations using GRADE, our results suggest the desirability of such training for  
26  
27 those involved in formulating recommendations to optimize use of GRADE.  
28  
29

30  
31 Finally our results highlight the need for authors of trustworthy recommendations or  
32  
33 guidelines<sup>1</sup> to provide clear and explicit comparators, as well as transparent and  
34  
35 systematic reports of the key ingredients of their rationale when moving from evidence  
36  
37 to recommendation.<sup>17 23 24</sup> Future avenues for research should also look at optimal  
38  
39 presentation formats of EBM textbooks and guidelines, to ensure clinicians actually  
40  
41 understand both the rationale and potential implications of all recommendations for  
42  
43 clinical practice.<sup>8 25-28</sup>  
44  
45  
46  
47  
48  
49  
50  
51  
52  
53  
54  
55  
56  
57  
58  
59  
60

## LIST OF ABBREVIATIONS

GRADE: Grading of Recommendations Assessment, Development and Evaluation

WHO: World Health Organization

ACCP: American College of Chest Physicians

## COMPETING INTERESTS

TA, AK, IN, RBP, PEA, DR, POV, and GHG are active members of the GRADE working group.

DR, at the time the data on graded recommendations was extracted from UpToDate and until 2016, was an employee of UpToDate – he reports personal fees from UpToDate, outside the submitted work.

GHG contributes to the training in GRADE methods for UpToDate in-house deputy editors, for which he reports personal fees from UpToDate, outside the submitted work.

## CONTRIBUTORS

Thomas Agoritsas (TA) and Gordon H. Guyatt (GHG) designed the study. David Rind (DR) provided the list of all recommendations and grading from UpToDate. Paul E. Alexander (PEA) helped structuring data abstraction. Thomas Agoritsas (TA), Arnaud Merglen (AM), Anja F. Heen (AFH), Annette Kristiansen (AK), Ignacio Neumann (IN), Juan P. Brito (JPB), Romina Brignardello-Petersen (RBP), and Per O. Vandvik (POV) reviewed the recommendations in duplicate and classified them according to GRADE taxonomy. Thomas Agoritsas (TA) and Gordon Guyatt (GG) wrote the first draft of the manuscript. All authors have read the manuscripts and made improvements of the content and wording.

## FUNDING / ACKNOWLEDGMENTS

This research received no specific grant from any funding agency in the public, commercial or not-for-profit sectors.

## DATA SHARING STATEMENT

There were no additional unpublished data from this study.

## REFERENCES

1. Institute of Medicine (US) Committee on Standards for Developing Trustworthy Clinical Practice Guidelines. . In: Graham R, Mancher M, Miller Wolman D, et al., eds. *Clinical Practice Guidelines We Can Trust*. Washington (DC), 2011.
2. Guyatt GH, Oxman AD, Vist GE, et al. GRADE: an emerging consensus on rating quality of evidence and strength of recommendations. *BMJ* 2008;**336**(7650):924-6.
3. Guyatt G, Oxman AD, Akl EA, et al. GRADE guidelines: 1. Introduction-GRADE evidence profiles and summary of findings tables. *J Clin Epidemiol* 2011;**64**(4):383-94.
4. Alonso-Coello P, Schunemann HJ, Moberg J, et al. GRADE Evidence to Decision (EtD) frameworks: a systematic and transparent approach to making well informed healthcare choices. 1: Introduction. *BMJ* 2016;**353**:i2016.
5. Alonso-Coello P, Oxman AD, Moberg J, et al. GRADE Evidence to Decision (EtD) frameworks: a systematic and transparent approach to making well informed healthcare choices. 2: Clinical practice guidelines. *BMJ* 2016;**353**:i2089.
6. Andrews J, Guyatt G, Oxman AD, et al. GRADE guidelines: 15. Going from evidence to recommendations: the significance and presentation of recommendations. *J Clin Epidemiol* 2013.
7. Balshem H, Helfand M, Schunemann HJ, et al. GRADE guidelines: 3. Rating the quality of evidence. *J Clin Epidemiol* 2011;**64**(4):401-6.
8. Agoritsas T, Heen AF, Brandt L, et al. Decision aids that really promote shared decision making: the pace quickens. *BMJ* 2015;**350**:g7624.
9. Alexander PE, Brito JP, Neumann I, et al. World Health Organization strong recommendations based on low-quality evidence (study quality) are frequent and often inconsistent with GRADE guidance. *J Clin Epidemiol* 2016;**72**:98-106.
10. Alexander PE, Bero L, Montori VM, et al. World Health Organization recommendations are often strong based on low confidence in effect estimates. *J Clin Epidemiol* 2014;**67**(6):629-34.
11. Brito JP, Domecq JP, Murad MH, et al. The Endocrine Society guidelines: when the confidence cart goes before the evidence horse. *The Journal of clinical endocrinology and metabolism* 2013;**98**(8):3246-52.
12. Vigersky RA, Bhasin S, Martin KA. The Endocrine Society Clinical Practice Guidelines: a self-assessment. *The Journal of clinical endocrinology and metabolism* 2013;**98**(8):3174-7.
13. Neumann I, Santesso N, Akl EA, et al. A guide for health professionals to interpret and use recommendations in guidelines developed with the GRADE approach. *J Clin Epidemiol* 2016;**72**:45-55.
14. Guyatt GH, Schunemann HJ, Djulbegovic B, et al. Guideline panels should not GRADE good practice statements. *J Clin Epidemiol* 2014.
15. UpToDate, Waltham, MA. <http://www.uptodate.com> (Accessed on July 7, 2017).
16. Agoritsas T, T Vandvik PO, Neumann I, Rochweg B, Jaeschke R, Hayward R, Guyatt GH, McKibbin A. Chapter 5. Finding Current Best Evidence, in *JAMA Users' Guides to the Medical Literature: A Manual for Evidence-Based Clinical Practice*, 3rd Edition, McGraw-Hill Medical, 2015.

17. Guyatt G, Oxman AD, Akl E, et al. GRADE guidelines 1. Introduction-GRADE evidence profiles and summary of findings tables. *J Clin Epidemiol* 2010.
18. Agoritsas T, Neumann I, Mendoza C, et al. Guideline conflict of interest management and methodology heavily impacts on the strength of recommendations: comparison between two iterations of the American College of Chest Physicians Antithrombotic Guidelines. *J Clin Epidemiol* 2017;**81**:141-43.
19. Alexander PE, Gionfriddo MR, Li SA, et al. A number of factors explain why WHO guideline developers make strong recommendations inconsistent with GRADE guidance. *J Clin Epidemiol* 2016;**70**:111-22.
20. Guyatt GH, Norris SL, Schulman S, et al. Methodology for the development of antithrombotic therapy and prevention of thrombosis guidelines: Antithrombotic Therapy and Prevention of Thrombosis, 9th ed: American College of Chest Physicians Evidence-Based Clinical Practice Guidelines. *Chest* 2012;**141**(2 Suppl):53S-70S.
21. Nasser SM, Cooke G, Kranzer K, et al. Strength of recommendations in WHO guidelines using GRADE was associated with uptake in national policy. *J Clin Epidemiol* 2015;**68**(6):703-7.
22. Alexander PE, Li SA, Gionfriddo MR, et al. Senior GRADE methodologists encounter challenges as part of WHO guideline development panels: an inductive content analysis. *J Clin Epidemiol* 2016;**70**:123-8.
23. Guyatt GH, Oxman AD, Kunz R, et al. GRADE guidelines: 2. Framing the question and deciding on important outcomes. *J Clin Epidemiol* 2011;**64**(4):395-400.
24. Guyatt GH, Oxman AD, Kunz R, et al. Going from evidence to recommendations. *BMJ* 2008;**336**(7652):1049-51.
25. Vandvik PO, Brandt L, Alonso-Coello P, et al. Creating clinical practice guidelines we can trust, use, and share: a new era is imminent. *Chest* 2013;**144**(2):381-9.
26. Kristiansen A, Brandt L, Alonso-Coello P, et al. Development of a novel multilayered presentation format for clinical practice guidelines. *Chest* 2014.
27. Treweek S, Oxman AD, Alderson P, et al. Developing and evaluating communication strategies to support informed decisions and practice based on evidence (DECIDE): protocol and preliminary results. *Implement Sci* 2013;**8**:6.
28. Siemieniuk RA, Agoritsas T, Macdonald H, et al. Introduction to BMJ Rapid Recommendations. *BMJ* 2016;**354**:i5191.



**Table 1. Paradigmatic situations in which a strong recommendation may be warranted despite low or very low certainty in effect estimates (appropriate strength, consistent with GRADE)**

| Situation                                                                                 | Certainty in Estimates (Quality of Evidence) |                               | Balance of Benefits and Harms                                                                                                                                                 | Values and Preferences                                                                                                | Resource Considerations                                                                                  | Recommendation                                                            | Example                                                                                                                                                                                                                                                                                                                                                                                                                                                                                               |
|-------------------------------------------------------------------------------------------|----------------------------------------------|-------------------------------|-------------------------------------------------------------------------------------------------------------------------------------------------------------------------------|-----------------------------------------------------------------------------------------------------------------------|----------------------------------------------------------------------------------------------------------|---------------------------------------------------------------------------|-------------------------------------------------------------------------------------------------------------------------------------------------------------------------------------------------------------------------------------------------------------------------------------------------------------------------------------------------------------------------------------------------------------------------------------------------------------------------------------------------------|
|                                                                                           | Benefits                                     | Harms                         |                                                                                                                                                                               |                                                                                                                       |                                                                                                          |                                                                           |                                                                                                                                                                                                                                                                                                                                                                                                                                                                                                       |
| <b>1. Life-threatening (or catastrophic) situation</b>                                    | Low or very low                              | Immaterial (very low to high) | Intervention may reduce mortality in a life-threatening situation; adverse events not prohibitive                                                                             | A very high value is placed on an uncertain but potentially life-preserving benefit                                   | Small incremental cost (or resource use) relative to the benefits justify the intervention               | Strong recommendation in favor of the intervention                        | Indirect evidence from seasonal influenza suggests that patients with avian influenza may benefit from the use of oseltamivir (low certainty in effect estimates). Given the high mortality of the disease and the absence of effective alternatives, the WHO made a strong recommendation in favor of the use of oseltamivir rather than no treatment in patients with avian influenza.                                                                                                              |
| <b>2. Uncertain benefit, certain harm</b>                                                 | Low or very low                              | High or moderate              | Possible but uncertain benefit; substantial established harm                                                                                                                  | A much higher value is placed on the adverse events in which we are confident than in the benefit, which is uncertain | High incremental cost (or resource use) relative to the benefits may not justify the intervention        | Strong recommendation against the intervention                            | In patients with idiopathic pulmonary fibrosis, treatment with azathioprine plus prednisone offers a possible but uncertain benefit in comparison with no treatment. The intervention, however, is associated with a substantial established harm. An international guideline made a recommendation against the combination of corticosteroids plus azathioprine in patients with idiopathic pulmonary fibrosis.                                                                                      |
| <b>3. Potential equivalence, one option clearly less risky or costly</b>                  | Low or very low                              | High or moderate              | Magnitude of benefit apparently similar—though uncertain—for alternatives; we are confident less harm or cost for one of the competing alternatives                           | A high value is placed on the reduction in harm                                                                       | High incremental cost (or resource use) relative to the benefits may not justify one of the alternatives | Strong recommendation for less harmful/less expensive                     | Low-quality evidence suggests that initial <i>Helicobacter pylori</i> eradication in patients with early stage extranodal marginal zone (MALT) B-cell lymphoma results in similar rates of complete response in comparison with the alternatives of radiation therapy or gastrectomy, but with high certainty of less harm, morbidity, and cost. Consequently, UpToDate made a strong recommendation in favor of <i>H pylori</i> eradication rather than radiotherapy in patients with MALT lymphoma. |
| <b>4. High certainty in similar benefits, one option potentially more risky or costly</b> | High or moderate                             | Low or very low               | Established that magnitude of benefit is similar for alternative management strategies; best (though uncertain) estimate is that one alternative has appreciably greater harm | A high value is placed on avoiding the potential increase in harm                                                     | High incremental cost (or resource use) relative to the benefits may not justify one of the alternatives | Strong recommendation against the intervention with possible greater harm | In women requiring anticoagulation and planning conception or in pregnancy, high certainty estimates suggest similar effects of different anticoagulants. However, indirect evidence (low certainty in effect estimates) suggests potential harm to the unborn infant with oral direct thrombin (eg, dabigatran) and factor Xa inhibitors (eg, rivaroxaban, apixaban). The AT9 guidelines recommended against the use of such anticoagulants in women planning conception or in pregnancy.            |
| <b>5. Potential catastrophic harm</b>                                                     | Immaterial (very low to high)                | Low or very low               | Potential important harm of the intervention, magnitude of benefit is variable                                                                                                | A high value is placed on avoiding potential increase in harm                                                         | High incremental cost (or resource use) relative to the benefits, may not justify the intervention       | Strong recommendation against the intervention                            | In males with androgen deficiency, testosterone supplementation likely improves quality of life. Low- certainty evidence suggests that testosterone increases cancer spread in patients with prostate cancer. The US Endocrine Society made a recommendation against testosterone supplementation in patients with prostate cancer.                                                                                                                                                                   |

Reproduced and adapted from Neumann & al.,<sup>13</sup>.



**Table 2. Inappropriate reasons for issuing strong recommendation based on low or certainty in effect estimates (*inconsistent with GRADE*)**

| Situation                                                                                                                                                                   | Example                                                                                                                                                                                                                                                             |
|-----------------------------------------------------------------------------------------------------------------------------------------------------------------------------|---------------------------------------------------------------------------------------------------------------------------------------------------------------------------------------------------------------------------------------------------------------------|
| <b>Best practice recommendation</b><br>(for which sensible alternatives do not exist)                                                                                       | "For patients with congenital adrenal hyperplasia, we recommend monitoring patients for signs of glucocorticoid excess, as well as for signs of inadequate androgen suppression." This statement should not have been GRADEed as sensible alternatives do not exist |
| <b>Misclassification of certainty was warranted</b><br>(typically because indirect evidence of moderate certainty, driving the strong recommendation, was not acknowledged) | "We recommend intensive lifestyle modification to the entire family and to the patient, and as the prerequisite for all overweight and obesity treatments for children and adolescents." GRADE as low quality when there is moderate quality evidence for benefits  |
| <b>Lack of compelling explanation</b><br>(the recommendation should have been weak)                                                                                         | "If a patient is unable or unwilling to undergo surgery, we recommend medical treatment with mineralocorticoids" Lack of evidence of mineralocorticoids being superior to other medical treatment (eg, anti-hypertensive medications)                               |

Elements adapted from Brito et al.<sup>11</sup>

**Table 3. Distribution of the strength of the recommendations in UpToDate according to the certainty in evidence**

|                           | <b>Weak<br/>Recommendations</b> | <b>Strong<br/>Recommendations</b> | <b>All<br/>Recommendations</b> |
|---------------------------|---------------------------------|-----------------------------------|--------------------------------|
|                           | <b>N (%)</b>                    | <b>N (%)</b>                      | <b>N (%)</b>                   |
| <b>Low certainty</b>      | 4335 (66.7%)                    | 366 (12.4%)                       | 4701 (49.7%)                   |
| <b>Moderate certainty</b> | 2019 (31.1%)                    | 1740 (59.0%)                      | 3759 (39.8%)                   |
| <b>High certainty</b>     | 147 (2.3%)                      | 844 (28.6%)                       | 991 (10.5%)                    |
| <b>Total</b>              | <b>6501</b>                     | <b>2950</b>                       | <b>9451</b>                    |
|                           | <b>(68.8% of all rec)</b>       | <b>(31.2% of all rec)</b>         | <b>(100%)</b>                  |

**Table 4. Characteristics of all 349 discordant recommendations in UpToDate, and proportion of appropriate discordant recommendations**

|                                                                                       | N (%)      | % of appropriate discordant<br>( <i>p</i> -value) |
|---------------------------------------------------------------------------------------|------------|---------------------------------------------------|
| <b><i>Clinical Specialties</i></b>                                                    |            | ( <i>p</i> = 0.160)                               |
| Primary Care and General Internal Medicine                                            | 15 (4.3)   | 53.3                                              |
| Emergency Medicine                                                                    | 16 (4.6)   | 81.3                                              |
| Critical Care                                                                         | 5 (1.4)    | 80.0                                              |
| Internal Medicine specialties                                                         | 158 (45.3) | 57.6                                              |
| Oncology (including hemato-oncology)                                                  | 43 (12.3)  | 55.8                                              |
| Pediatrics                                                                            | 73 (20.9)  | 47.9                                              |
| Obstetrics, Gynecology and Women Health                                               | 19 (5.4)   | 73.7                                              |
| General Surgery                                                                       | 13 (3.7)   | 69.2                                              |
| Anesthesiology                                                                        | 3 (0.9)    | 100.0                                             |
| Psychiatry                                                                            | 4 (1.1)    | 75.0                                              |
| <b><i>Intervention type</i></b>                                                       |            | ( <i>p</i> = 0.010)                               |
| Drug intervention                                                                     | 197 (56.4) | 61.4                                              |
| Surgical interventions                                                                | 69 (19.8)  | 59.4                                              |
| Medical device                                                                        | 24 (6.9)   | 62.5                                              |
| Behavioural or multi-disciplinary intervention                                        | 35 (10.0)  | 57.1                                              |
| Diagnostic test, screening programmes                                                 | 24 (6.9)   | 29.2                                              |
| <b><i>Clarity of the comparator</i></b>                                               |            | ( <i>p</i> < 0.001)                               |
| Comparator not at all clear – very uncertain                                          | 46 (13.2)  | 37.0                                              |
| Comparator not clearly and explicitly stated or obvious, but relatively easy to infer | 120 (34.4) | 48.3                                              |
| Comparator not clearly and explicitly stated, but obvious                             | 110 (31.5) | 68.2                                              |
| Comparator clearly and explicitly stated                                              | 73 (20.9)  | 74.0                                              |
| <b><i>Type of comparator</i></b>                                                      |            | ( <i>p</i> = 0.083)                               |
| Too unclear                                                                           | 25 (7.2)   | 44.0                                              |
| No intervention (or placebo)                                                          | 126 (36.1) | 54.0                                              |
| Other intervention(s) (standard of care or alternative(s))                            | 198 (56.7) | 63.1                                              |
| <b><i>Direction of the recommendation</i></b>                                         |            | ( <i>p</i> < 0.001)                               |
| For the intervention (i.e. against the comparator)                                    | 274 (78.5) | 51.1                                              |
| Against the intervention (i.e. for the comparator)                                    | 75 (21.5)  | 85.3                                              |
| <b><i>Mortality</i></b>                                                               |            | ( <i>p</i> < 0.001)                               |
| No statement about mortality                                                          | 189 (54.2) | 47.1                                              |
| Implicit statement about mortality                                                    | 47 (13.5)  | 68.1                                              |
| Explicit statement about mortality                                                    | 113 (32.4) | 73.5                                              |
| <b><i>Balance of benefits and harms</i></b>                                           |            | ( <i>p</i> < 0.001)                               |
| No statement about the balance of outcomes                                            | 100 (28.7) | 28.0                                              |
| Implicit statement about the balance of outcomes                                      | 157 (45.0) | 66.9                                              |
| Explicit statement about the balance of outcomes                                      | 92 (26.4)  | 77.2                                              |

|                                                                   |                  |             |                       |
|-------------------------------------------------------------------|------------------|-------------|-----------------------|
| <b>Relative Importance of outcomes - Values &amp; Preferences</b> |                  |             | <i>(p &lt; 0.001)</i> |
| No statement about the relative importance of outcomes            | 168 (48.1)       | 42.9        |                       |
| Implicit statement about the relative importance of outcomes      | 171 (49.0)       | 73.1        |                       |
| Explicit statement about the relative importance of outcomes      | 10 (2.9)         | 70.0        |                       |
| <b>Cost of resources</b>                                          |                  |             | <i>(p = 0.023)</i>    |
| No statement about cost or resources                              | 334 (95.7)       | 57.2        |                       |
| Cost or resources clearly and explicitly stated                   | 15 (4.3)         | 86.7        |                       |
| <b>Supporting systematic review (SR)</b>                          |                  |             | <i>(p = 0.175)</i>    |
| No SR is cited                                                    | 300 (86.0)       | 56.3        |                       |
| SR of Observational studies                                       | 22 (6.3)         | 63.6        |                       |
| SR of both RCT and Observational studies                          | 13 (3.7)         | 76.9        |                       |
| SR of Randomized Trials (RCT)                                     | 14 (4.0)         | 78.6        |                       |
| <b>Design of primary studies</b>                                  |                  |             | <i>(p = 0.002)</i>    |
| No reference cited                                                | 45 (12.9)        | 35.6        |                       |
| Other type (eg narrative review, book chapter)                    | 48 (13.8)        | 54.2        |                       |
| Observational studies                                             | 203 (58.2)       | 61.1        |                       |
| Randomized Trials (RCT)                                           | 53 (15.2)        | 71.7        |                       |
| <b>Total</b>                                                      | <b>349 (100)</b> | <b>58.5</b> |                       |

**Table 5. Summary judgments on the appropriateness of 349 discordant strong recommendation based on low certainty in effect in UpToDate**

|                                                                           | N (%)             |
|---------------------------------------------------------------------------|-------------------|
| <b>Appropriate discordant recommendations (consistent with GRADE)</b>     |                   |
| 1. Life-threatening (or catastrophic) situation                           | 70 (20.1)         |
| 2. Uncertain Benefit, Certain Harm                                        | 28 (8.0)          |
| 3. Potential similar benefits, One clearly less risky (or costly)         | 56 (16.0)         |
| 4. Established similar benefits, One potentially more risky (or costly)   | 18 (5.2)          |
| 5. Potential catastrophic harm                                            | 32 (9.2)          |
| Total                                                                     | <b>204 (58.5)</b> |
| <b>Inappropriate discordant recommendations (inconsistent with GRADE)</b> |                   |
| 6. Good Practice Statement                                                | 47 (13.5)         |
| 7. Misclassification of certainty (judged moderate or high)               | 38 (10.9)         |
| 8. Lack of explanation, should have been weak recommendation (GRADE 2C)   | 60 (17.2)         |
| Total                                                                     | <b>145 (41.5)</b> |

## Supplementary File 1. INSTRUCTION FOR ABSTRACTION

*Please read carefully before starting abstraction.*

*For any questions please contact me ASAP ([thomas.agoritsas@gmail.com](mailto:thomas.agoritsas@gmail.com))*

### Background

- In a first phase of the project, we characterized the strength and confidence of the 9451 GRADE recommendations in UTD.
- In this last phase, we are focusing on
  - The **349 strong recommendations based on low confidence (GRADE 1C)**
  - Which are included in a total of **274 topics** (=chapters in UpToDate).
- The main objective is to categorize them based according the following taxonomy
  - Appropriate grading: recommendation consistent with one of the five paradigmatic situations defined the GRADE framework (see examples in Table 1 below):
    - [App#1] Life-threatening situation
    - [App#2] Uncertain Benefit, Certain Harm
    - [App#3] Potential similar benefits, one clearly less risky (or costly)
    - [App#4] Established similar benefits, one potentially more risky (or costly)
    - [App#5] Potential catastrophic harm of one option
  - Inappropriate grading: recommendation inconsistent with GRADE (see examples in Table 2 below), in short:
    - [Inapp#1] Good Practice Statement
    - [Inapp#2] Misclassification of confidence (should have been GRADE 1B or 1A)
    - [Inapp#3] Lack of explanation, should have been a weak rec (GRADE 2C)

→ Before starting, please read the examples and **Appendix Tables 1 & 2**, they are also embedded in separate tabs in the abstraction excel file. Do not focus on memorizing them, as data abstraction will guide you in your judgment.

### Abstraction Excel File & Variables

- We will conduct the whole abstraction process in the attached standardized excel file
- We have kept the variables to abstract to the minimum necessary, most with **pre-defined response categories in drop-down menus** (and infrequently as free-text for copy-pasting).
- **Each recommendation has a separate row in the file.** There are sometimes more than GRADE 1C per UTD topic (the number are indicated).
- **As a guiding principle, keep in mind that the main objective is to assess the most appropriate taxonomy (first as appropriate or inappropriate, then subcategory). These are the last variables in the file.**
- This requires judgment based on what is reported in the UpToDate topic, mostly in narrative form. Indeed, there are typically no “summary of findings tables” of “evidence profiles” to explicit GRADE assessment. Absolute certainty in taxonomy is sometimes hard to achieve, but try and assign the best fit you can.
- The abstraction form is organized as follows to guide your final judgment:

|                                 |                                                                                                                                                                              |
|---------------------------------|------------------------------------------------------------------------------------------------------------------------------------------------------------------------------|
| UpToDate TOPIC & RECOMMENDATION | Pre-entered data to help you identify the relevant topic in the UpToDate topic in the dropdown                                                                               |
| POPULATION                      | Check pre-entered clinical field, document age-group                                                                                                                         |
| INTERVENTION                    | Intervention type                                                                                                                                                            |
| COMPARATOR                      | Clarity and type of the comparator, direction of rec                                                                                                                         |
| OUTCOME – Benefits & Harms      | Statement about: mortality, balance of benefits & harms, their relative importance (ie. values/preferences), cost                                                            |
| EVIDENCE supporting the rec     | Date of literature review & updates<br>number and type of supporting evidence<br>Indication regarding the potential role of indirect evidence,<br>Presence of large effects. |
| Conflict of interest (COI)      | Copy paste statement, presence of financial COI                                                                                                                              |
| TAXONOMY – APPROPRIATE          | <b>Separate judgement on each of the 5 paradigmatic situation defined by GRADE</b><br>(clear, possible, no)                                                                  |
| TAXONOMY – INAPPROPRIATE        | <b>Separate judgment on each of the 3 inappropriate situations</b>                                                                                                           |
| CONFLICT RESOLUTION             | <b>TAXONOMY DECISION</b> (for kappa),<br>confidence in the decision (to document),<br>assessing agreement and <b>RECONCILED TAXONOMY</b> within each pair of abstractor.     |
| ADJUDICATION                    | Recording adjudication third reviewer if this was necessary                                                                                                                  |

- **Specific guidance for each variable is found in the GREY BOXES on top of each column.**
- **Please read and select best option from DROP-DOWN menus within each cell**
- A few cells are for free-text to copy paste from the topic. Be sure to double click in the cell before pasting content, to keep the format intact.
- Most variables are followed by a column labelled “**additional comments**” or “**rationale**”. These are for your personal notes to guide conflict resolution.
- A few examples already abstracted are shown in the first rows as an indication.

### **Abstraction: STEP-BY-STEP**

**Start abstracting a few first recommendations to get familiar with the process and contact me ([thomas.agoritsas@gmail.com](mailto:thomas.agoritsas@gmail.com)) for any question. I’m happy to have a quick skype if and as often as necessary.**

- Go to the recommendation in the next row in the excel file.
- The [topic\_#] and [topic\_title] correspond to the name of the **PDF file** for the corresponding UTD topic → Open it.
- **Search automatically (ctrl-R or command-F) for “1C” → This will directly lead you to the GRADE 1C recommendation(s) at the end of the topic under the “Summary and Recommendations” section.**
- Read it carefully, and take a few seconds to try and get some first rough impression re: potential taxonomy
- **Then, find the corresponding paragraph in the topic that supports the recommendation** (it is often indicated soon after the recommendation (e.g. “See treatment...”). If not, try and find which paragraph(s) discuss(es) the recommendation.
- Abstract all variables in the order of the file as this will guide your formal judgment.
- Then judge each of the 5 appropriate and 3 inappropriate categories in the taxonomy.
- Then decide which one fits best and document the confidence you have in your assessment.
- Go to the next recommendation in the next row. (if this is in the same topic, you’ll be able to copy several or your answers.

## **Conflict resolution and adjudication**

- You've been assigned with a paired reviewer. Schedule a first conflict resolution in the following days to ensure you are on the same page.
- Record the agreed taxonomy in the specific column ("RECONCILED TAXONOMY"). Do NOT modify your initial judgement ("TAXONOMY DECISION") - as this will use to calculate kappa.
- **If you cannot resolve conflict, send us your questions for adjudication by a third reviewer.**
- Record adjudication in the final column.

➤ Thanks again for your help. Do not hesitate to contact me for any questions ([thomas.agoritsas@gmail.com](mailto:thomas.agoritsas@gmail.com))



**Supplementary File 2.****Characteristics of all 9451 recommendations in UpToDate: certainty effect estimates and clinical fields**

|                                            | N (%)             | % of Strong Rec | % of strong rec discordant | % of any rec being discordant |
|--------------------------------------------|-------------------|-----------------|----------------------------|-------------------------------|
| <b><i>Clinical Fields</i></b>              |                   |                 |                            |                               |
| 1 Primary Care & General Internal Medicine | 356 (3.8)         | 22.5            | 16.3                       | 3.7                           |
| 2 Emergency Medicine                       | 295 (3.1)         | 25.1            | <b>23.0</b>                | <b>5.8</b>                    |
| 3 Critical Care                            | 144 (1.5)         | 34.0            | 10.2                       | 3.5                           |
| 4 Cardiovascular Medicine                  | 529 (5.6)         | <b>42.7</b>     | 5.3                        | 2.3                           |
| 5 Infectious Diseases                      | 870 (9.2)         | <b>41.3</b>     | <b>19.5</b>                | <b>8.0</b>                    |
| 6 Nephrology and Hypertension              | 475 (5.0)         | <b>39.8</b>     | 6.3                        | 2.5                           |
| 7 Pulmonary Medicine                       | 347 (3.7)         | 34.6            | 6.7                        | 2.3                           |
| 8 Hematology (non-oncology)                | 192 (2.0)         | <b>41.1</b>     | <b>26.6</b>                | <b>10.9</b>                   |
| 9 Neurology                                | 395 (4.2)         | 31.1            | <b>17.9</b>                | <b>5.6</b>                    |
| 10 Allergy and Immunology                  | 261 (2.8)         | 23.4            | 3.3                        | 0.8                           |
| 11 Endocrinology & Diabetes                | 504 (5.3)         | 19.0            | 6.3                        | 1.2                           |
| 12 Gastroenterology & Hepatology           | 471 (5.0)         | 22.9            | 7.4                        | 1.7                           |
| 13 Rheumatology                            | 216 (2.3)         | 21.3            | 4.3                        | 0.9                           |
| 14 Palliative Care                         | 33 (0.3)          | 18.2            | 0.0                        | 0.0                           |
| 15 Oncology                                | 1255 (13.3)       | <b>36.0</b>     | 7.7                        | 2.8                           |
| 16 Hemato-oncology                         | 263 (2.8)         | 27.8            | <b>20.5</b>                | <b>5.7</b>                    |
| 17 Pediatrics                              | 1057 (11.2)       | <b>39.5</b>     | <b>17.7</b>                | <b>7.0</b>                    |
| 18 Pediatric Emergency Medicine            | 126 (1.3)         | 28.6            | 5.6                        | 1.6                           |
| 19 Gynecology & Obstetrics                 | 709 (7.5)         | 22.3            | 12.0                       | 2.7                           |
| 20 General Surgery                         | 403 (4.3)         | <b>32.8</b>     | 12.1                       | 4.0                           |
| 21 Anesthesiology                          | 48 (0.5)          | 16.7            | <b>37.5</b>                | <b>6.3</b>                    |
| 22 Dermatology                             | 240 (2.5)         | 5.8             | 0.0                        | 0.0                           |
| 23 Psychiatry                              | 262 (2.8)         | 16.8            | 9.1                        | 1.5                           |
| <b>TOTAL</b>                               | <b>9451 (100)</b> | <b>31.2</b>     | <b>12.4</b>                | <b>3.9</b>                    |

# BMJ Open

## UpToDate adherence to GRADE criteria for strong recommendations: an analytic survey

|                                 |                                                                                                                                                                                                                                                                                                                                                                                                                                                                                                                                                                                                                                                                                                                                                                                                                                                                                                                                                                                                                                                                                                                                                                                                                                                                                                            |
|---------------------------------|------------------------------------------------------------------------------------------------------------------------------------------------------------------------------------------------------------------------------------------------------------------------------------------------------------------------------------------------------------------------------------------------------------------------------------------------------------------------------------------------------------------------------------------------------------------------------------------------------------------------------------------------------------------------------------------------------------------------------------------------------------------------------------------------------------------------------------------------------------------------------------------------------------------------------------------------------------------------------------------------------------------------------------------------------------------------------------------------------------------------------------------------------------------------------------------------------------------------------------------------------------------------------------------------------------|
| Journal:                        | <i>BMJ Open</i>                                                                                                                                                                                                                                                                                                                                                                                                                                                                                                                                                                                                                                                                                                                                                                                                                                                                                                                                                                                                                                                                                                                                                                                                                                                                                            |
| Manuscript ID                   | bmjopen-2017-018593.R1                                                                                                                                                                                                                                                                                                                                                                                                                                                                                                                                                                                                                                                                                                                                                                                                                                                                                                                                                                                                                                                                                                                                                                                                                                                                                     |
| Article Type:                   | Research                                                                                                                                                                                                                                                                                                                                                                                                                                                                                                                                                                                                                                                                                                                                                                                                                                                                                                                                                                                                                                                                                                                                                                                                                                                                                                   |
| Date Submitted by the Author:   | 11-Sep-2017                                                                                                                                                                                                                                                                                                                                                                                                                                                                                                                                                                                                                                                                                                                                                                                                                                                                                                                                                                                                                                                                                                                                                                                                                                                                                                |
| Complete List of Authors:       | <p>Agoritsas, Thomas; University Hospitals of Geneva, Division of General Internal Medicine &amp; Division of Clinical Epidemiology; McMaster University Faculty of Health Sciences, Department of Health Research Methods, Evidence, and Impact</p> <p>Merglen, Arnaud; University Hospitals of Geneva, Division of General Pediatrics</p> <p>Heen, Anja; Innlandet Hospital Trust-division Gjøvik, Department of Internal Medicine</p> <p>Kristiansen, Annette; Inland hospital trust, Internal medicine, Gjøvik</p> <p>Neumann, Ignacio; Pontificia Universidad Catolica de Chile, Department of Internal Medicine; McMaster University, Department of Health Research Methods, Evidence, and Impact,</p> <p>Brito, Juan; Mayo Clinic Minnesota, Department of Medicine and Knowledge and Evaluation Research Unit,</p> <p>Brignardello-Petersen, Romina; McMaster University, Department of Health Research Methods, Evidence, and Impact</p> <p>Alexander, Paul; McMaster University, Department of Health Research Methods, Evidence, and Impact</p> <p>Rind, David; Institute for Clinical and Economic Review</p> <p>Vandvik, Per; Norwegian Knowledge Centre for the Health Services,</p> <p>Guyatt, Gordon; McMaster University, Department of Health Research Methods, Evidence, and Impact</p> |
| <b>Primary Subject Heading</b>: | Evidence based practice                                                                                                                                                                                                                                                                                                                                                                                                                                                                                                                                                                                                                                                                                                                                                                                                                                                                                                                                                                                                                                                                                                                                                                                                                                                                                    |
| Secondary Subject Heading:      | Epidemiology                                                                                                                                                                                                                                                                                                                                                                                                                                                                                                                                                                                                                                                                                                                                                                                                                                                                                                                                                                                                                                                                                                                                                                                                                                                                                               |
| Keywords:                       | Clinical Practice Guidelines, Strength of Recommendations, Quality of the Evidence, Clinical Decision Making, Evidence-Based Medicine                                                                                                                                                                                                                                                                                                                                                                                                                                                                                                                                                                                                                                                                                                                                                                                                                                                                                                                                                                                                                                                                                                                                                                      |
|                                 |                                                                                                                                                                                                                                                                                                                                                                                                                                                                                                                                                                                                                                                                                                                                                                                                                                                                                                                                                                                                                                                                                                                                                                                                                                                                                                            |

SCHOLARONE™  
Manuscripts

1  
2  
3  
4 **UpToDate adherence to GRADE criteria for strong recommendations: an**  
5  
6 **analytic survey**  
7  
8

9 Thomas Agoritsas, MD, PhD <sup>1,2</sup>

10 Arnaud Merglen, MD, MSc <sup>3</sup>

11 Anja Fog Heen, MD <sup>4</sup>

12 Annette Kristiansen, MD, PhD <sup>4</sup>

13 Ignacio Neumann, MD, PhD <sup>2,5</sup>

14 Juan P Brito, MD, MSc <sup>6</sup>

15 Romina Brignardello-Petersen, DDS, MSc, PhD <sup>2,7</sup>

16 Paul E Alexander, MSc, PhD <sup>2</sup>

17 David M Rind, MD, MSc <sup>8</sup>

18 Per O. Vandvik, MD, PhD <sup>4,9</sup>

19 Gordon H Guyatt, MD, MSc <sup>2</sup>

20  
21  
22  
23  
24  
25  
26  
27  
28  
29  
30  
31  
32  
33  
34  
35  
36  
37  
38  
39  
40  
41 **Affiliations:**

42  
43 <sup>1</sup> Division of General Internal Medicine & Division of Clinical Epidemiology, University Hospitals of  
44 Geneva, Geneva, Switzerland.

45  
46  
47  
48 <sup>2</sup> Department of Health Research Methods, Evidence, and Impact, McMaster University, Faculty of Health  
49 Sciences, Hamilton, Ontario, Canada

50  
51  
52  
53 <sup>3</sup> Division of General Pediatrics, University Hospitals of Geneva & Faculty of Medicine, University of  
54 Geneva, Geneva, Switzerland.

55  
56  
57  
58 <sup>4</sup> Department of Internal Medicine, Innlandet Hospital Trust-division Gjøvik, Norway

1  
2  
3  
4  
5  
6  
7  
8  
9  
10  
11  
12  
13  
14  
15  
16  
17  
18  
19  
20  
21  
22  
23  
24  
25  
26  
27  
28  
29  
30  
31  
32  
33  
34  
35  
36  
37  
38  
39  
40  
41  
42  
43  
44  
45  
46  
47  
48  
49  
50  
51  
52  
53  
54  
55  
56  
57  
58  
59  
60

<sup>5</sup> Department of Internal Medicine, Pontificia Universidad Catolica de Chile, Santiago, Chile

<sup>6</sup> Division of Endocrinology, Diabetes, Metabolism and Nutrition, Department of Medicine and Knowledge and Evaluation Research Unit, Mayo Clinic, Rochester, USA

<sup>7</sup> Faculty of Dentistry, University of Chile, Chile.

<sup>8</sup> Institute for Clinical and Economic Review, Boston, MA, USA

<sup>9</sup> Institute of Health and Society, Faculty of Medicine, University of Oslo, Norway

\* **Correspondence to:** Thomas Agoritsas, MD, PhD ([thomas.agoritsas@gmail.com](mailto:thomas.agoritsas@gmail.com))

Division of General Internal Medicine & Division of Clinical Epidemiology

Department Internal Medicine, Rehabilitation and Geriatrics (DMIRG)

University Hospitals of Geneva, Rue Gabrielle-Perret-Gentil 4,

1211 Genève 14, Switzerland

Phone: +41 79 55 34 543

**Keywords:** Clinical Practice Guidelines, Strength of Recommendations, Quality of the Evidence, Clinical Decision Making, Evidence-Based Medicine.

**Abstract:** 283 words / **Manuscript:** 3064 words

**Tables:** 5 / **Supplementary Files:** 2

## ABSTRACT

### Introduction

UpToDate is widely used by clinicians worldwide and includes more than 9,400 recommendations that apply the GRADE framework. GRADE guidance warns against strong recommendations when certainty of the evidence is low or very low (discordant recommendations), but has identified five paradigmatic situations in which discordant recommendations may be justified.

### Objectives

Our objective was to document the strength of recommendations in UpToDate and assess the frequency and appropriateness of discordant recommendations.

### Design

Analytic survey of all recommendations in UpToDate

### Methods

We identified all GRADE recommendations in UpToDate, and examined their strength (strong or weak) and certainty of the evidence (high, moderate, or low certainty). We identified all discordant recommendations as of January 2015, and pairs of reviewers independently classified them either into one of the five appropriate paradigms or into one of three categories inconsistent with GRADE guidance.

### Results

UpToDate included 9451 GRADE recommendations, of which 6501 (68.8%) were formulated as weak recommendations and 2950 (31.2%) as strong. Among the strong,

1  
2  
3 844 (28.6%) were based on high certainty in effect estimates, 1,740 (59.0%) on  
4  
5 moderate certainty, and 366 (12.4%) on low certainty. Of the 349 discordant  
6  
7 recommendations 204 (58.5%) were judged appropriate (consistent with one of the five  
8  
9 paradigms); we classified 47 (13.5%) as good practice statements; 38 (10.9%)  
10  
11 misclassified the evidence as low certainty when it was at least moderate; and 60  
12  
13 (17.2%) warranted a weak rather than a strong recommendation.  
14  
15

## 16 17 18 **Conclusion**

19  
20 The proportion of discordant recommendations in UpToDate is small, and the  
21  
22 proportion that is truly problematic (strong recommendations that would best have  
23  
24 been weak) very small. Clinicians should nevertheless be cautious, and look for clear  
25  
26 explanations - in UpToDate and elsewhere - when guidelines offer strong  
27  
28 recommendations based on low certainty evidence.  
29  
30  
31  
32

### 33 **Strengths and limitations of this study**

- 34 - We assessed the strength of recommendations in the largest known sample of  
35  
36 recommendations using GRADE (N=9451) addressing a wide array of clinical fields.
- 37 - We used a taxonomy to appraise discordant recommendations that has been  
38  
39 successfully implemented in two prior assessments of clinical practice guidelines.
- 40 - We based our assessment solely on information published in UpToDate, while  
41  
42 authors of the topics may have considered other factors in deciding to issue a  
43  
44 discordant recommendation.
- 45 - UpToDate topics are narrative in nature and do not include formal summary of  
46  
47 finding tables. As a result, the comparators were often not clearly stated, which may  
48  
49 have influenced the reviewers' inferences about the discordant recommendations.  
50  
51  
52  
53  
54  
55  
56  
57  
58  
59  
60

## INTRODUCTION

To ensure that patients receive optimal care, consistent with their values and preferences, clinicians need trustworthy recommendations based on transparent ratings of certainty of evidence and strength of recommendations.<sup>1</sup> The widely adopted GRADE system (Grading of Recommendations Assessment, Development and Evaluation) offers a systematic and transparent framework to rate certainty (also referred to as quality or confidence) of evidence and to move from evidence to recommendations.<sup>2-5</sup>

Using GRADE, guideline-makers issue strong recommendations when they are confident that the desirable consequences clearly outweigh the undesirable consequences.<sup>6 7</sup> Conversely they should issue weak (also called conditional) when the balance of desirable and undesirable consequences between alternatives is close, the certainty in evidence is low, uncertainty or variability in patients' values and preferences is large, or cost-effectiveness is questionable.<sup>6</sup> Strong recommendations represent "just do it" recommendations applicable to almost all patients; weak recommendations are applicable to the majority of patients and include preference-sensitive decisions that require clinicians to ensure, through shared-decision making, that patients' choices are congruent with their values.<sup>8</sup>

GRADE views strong recommendations in the face of low certainty evidence (we will refer to such situations as *discordant recommendations*) as questionable, and often inappropriate. Some guidelines have a clear surfeit of discordant recommendations. For example, of 456 recommendations in 116 WHO guidelines, 160 (35%) proved discordant.<sup>9 10</sup> Similarly 121 of 357 (34%) recommendations in 17 Endocrine Society Guidelines proved discordant.<sup>11 12</sup>

Though discordant recommendations often represent a violation of GRADE guidance,

1  
2  
3 this is not always the case. GRADE has identified 5 seldom-occurring paradigmatic  
4  
5 situations in which a strong recommendation is warranted despite low certainty in the  
6  
7 evidence (Table 1).<sup>6 13</sup> Further, there is more than one explanation for an apparent  
8  
9 violation of GRADE guidance (a discordant recommendation that fails to meet one of  
10  
11 these criteria). First, the discordant recommendation may actually represent a good  
12  
13 practice statement, in which indirect evidence justifies an inference that the  
14  
15 recommended management option is far superior to the alternative.<sup>14</sup> Indirect evidence  
16  
17 refers to evidence that does not directly address the question at hand, but nevertheless  
18  
19 bears on the question. For instance, though there are no randomized trials of use of a  
20  
21 parachute after jumping out of plane, there is ample indirect evidence suggesting its  
22  
23 impact on mortality from the jump. Second, the panel may have misclassified the  
24  
25 certainty of the evidence (it may actually be moderate or high). Third, and most  
26  
27 concerning, the optimal management option is in fact value and preference-sensitive  
28  
29 and the panel should have issued a weak recommendation (Table 2).<sup>6 13</sup>

30  
31  
32 Of the 160 discordant recommendations in the WHO guideline, 73 (46%) fell into the  
33  
34 most concerning category of those that warranted a weak recommendation.<sup>9 10</sup> Of the  
35  
36 121 discordant recommendations in the Endocrine Society guidelines, 33 (27%)  
37  
38 warranted a weak recommendation.<sup>11</sup> These results demonstrate that excessive use of  
39  
40 strong recommendations in the face of low certainty evidence is common and  
41  
42 concerning.  
43  
44  
45  
46  
47

48  
49 UpToDate ([www.uptodate.com](http://www.uptodate.com))<sup>15</sup> is an electronic medical textbook that uses GRADE  
50  
51 and includes over 9,400 GRADE recommendations<sup>15 16</sup>. UpToDate has instituted  
52  
53 intensive training in GRADE methods for their in-house deputy editors who are largely  
54  
55 responsible for UpToDate material. Training involves regular large and small group  
56  
57  
58  
59  
60



1  
2  
3 seminars, and individual feedback from in-house methodologists.  
4

5  
6 Because it is enormously popular and used by clinicians worldwide, the possibility that  
7  
8 UpToDate is issuing misleading strong recommendations on the basis of low certainty  
9  
10 evidence constitutes a matter of concern. Therefore, we set out to determine, among all  
11  
12 GRADE recommendations in UpToDate, the distribution of strong and weak  
13  
14 recommendations, the proportion of discordant recommendations, and to characterize  
15  
16 discordant recommendations based on the taxonomy described above (Table 1 & 2). In  
17  
18 doing so, we restricted ourselves to the evidence presented in UpToDate, rather than  
19  
20 conducting our own literature review. The reason is that our interest was in evaluating  
21  
22 UpToDate editors' ability to formulate a GRADEd recommendation from the data they  
23  
24 present rather than their ability to find the most relevant data in the literature.  
25  
26  
27  
28  
29  
30  
31  
32  
33  
34  
35  
36  
37  
38  
39  
40  
41  
42  
43  
44  
45  
46  
47  
48  
49  
50  
51  
52  
53  
54  
55  
56  
57  
58  
59  
60

## METHODS

### Design and data source

We conducted an analytic survey of all GRADE recommendations included in UpToDate. We collaborated with UpToDate to identify all 9451 included in UpToDate as of June 2014, and determined their strength (strong or weak), and their certainty in evidence (high, moderate, or low – UpToDate does not use GRADE’s “very low” category). We abstracted the title of each topic, as well as their corresponding clinical domains and age-group populations. From this database, we identified all discordant recommendations included in UpToDate as of January 2015.

### Data abstraction on the discordant recommendations

UpToDate topics summarizing the evidence and rationale supporting the recommendations are mostly in narrative formats, and do not provide summary of finding tables or evidence profiles.<sup>17</sup> To assess the appropriateness of discordant recommendations according to the paradigmatic situation defined in the GRADE framework, we therefore standardized data abstraction to collect relevant information from the main text (detailed instruction [Supplementary File 1](#)).

Eight reviewers working in six pairs – all working actively as clinicians and proficient in GRADE methodology – performed data abstraction and assessed the appropriateness of discordant recommendations in duplicate. They abstracted the following information related to each discordant recommendation:

- Patient population (clinical field and age group);
- Type of intervention (drug, procedure, device, etc.) and type of comparator

(existing standard care, no intervention, alternative intervention, etc.);

- The clarity of the comparator, classified as (i) clearly and explicitly stated; (ii) not clearly and explicitly stated, but obvious; (iii) not clearly and explicitly stated or obvious, but relatively easy to infer; (iv) not at all clear - uncertain;
- Outcomes: whether there was an explicit statement on mortality as well as the balance of benefits and harms;
- Whether there was an explicit statement on the relative importance of outcomes and/or on patients' values and preferences in making the trade-offs between alternative courses of action;
- Whether issues of cost or resources were explicitly discussed;
- The evidence supporting the recommendation, both for systematic reviews and primary study designs (randomized trials, observational studies, etc.)
- Whether the evidence summary suggested large effects in critical outcomes, or that indirect evidence, not incorporated in the grading, seemed to drive the recommendation.

Based on this abstracted information, each reviewer independently classified each of the discordant recommendations as either consistent with one of the five previously identified optimal categories for discordant recommendations (Table 1)<sup>6 10 13</sup> or in one of three categories in which we judged discordant recommendations to be inconsistent with GRADE guidance (Table 2): (i) good practice statements; (ii) a misclassification of the evidence – the evidence warranted moderate or high certainty rather than low; or (iii) uncertainty in the estimates of effect would best lead to a weak recommendation. We assessed agreement for whether recommendations were appropriate (vs. inappropriate) according to GRADE guidance using the chance-corrected kappa statistic.

1  
2  
3 The reviewers resolved all disagreements by discussion or through referral to an  
4 additional reviewer.  
5  
6  
7

### 8 **Data analysis and reporting** 9

10  
11 We abstracted data in an MS Excel database (v. 14.4) with pre-specified response  
12 categories whenever possible, and exported in SPSS (v. 22.0) for analysis. We analyzed  
13 the recommendation and sample characteristics as natural frequencies and proportions.  
14  
15  
16  
17  
18  
19  
20  
21  
22  
23  
24  
25  
26  
27  
28  
29  
30  
31  
32  
33  
34  
35  
36  
37  
38  
39  
40  
41  
42  
43  
44  
45  
46  
47  
48  
49  
50  
51  
52  
53  
54  
55  
56  
57  
58  
59  
60

## RESULTS

The 2971 topics in UpToDate that included GRADE recommendations covered a broad spectrum of clinical fields and health care, including 16.1% in oncology, 49.2% topics in other internal medicine specialties or primary care, and 12.5% in pediatrics. These topics included 9451 GRADE recommendations, of which 6501 (68.8%) were formulated as weak recommendations and 2950 (31.2%) as strong recommendations (Table 3). The proportion of strong recommendations varied greatly across clinical fields, ranging from 5.8% (in dermatology) to 42.7% (in cardiovascular medicine) (Supplementary File 2).

Of the 2950 strong recommendations, 844 (28.6%) were based on high certainty evidence, 1740 (59.0%) on moderate certainty, and 366 (12.4%) were discordant strong recommendations based on low certainty evidence (Table 3). Because UpToDate is continuously updated, 17 recommendations were modified in strength and/or certainty between the time all 9451 recommendations were retrieved, and the time all topics were downloaded for abstraction, as of January 2015.<sup>15</sup> The final study cohort therefore comprised a total of 349 discordant recommendations.

The 349 discordant recommendations were issued across 274 individual topics in UpToDate (each including a range of one to five recommendations), and the topics addressed covered a broad spectrum of health care issues within each clinical field, (Supplementary File 2). Interventions included drugs (56.4% of recommendations), surgery (19.8%), medical devices (6.9%), diagnostic or screening tests (20.9%), and other behavioral or multi-disciplinary interventions (10.0%). These interventions were most often compared to another intervention or to standard of care (56.7%) and less often to no intervention or placebo (36.1%).

1  
2  
3 The 349 discordant recommendations represent 3.7% of all 9451 recommendations.  
4  
5 The proportion of discordant recommendations varied from 0% (e.g. in palliative care,  
6  
7 dermatology or for recommendations applying specifically to the elderly population), to  
8  
9 7.0% in pediatrics, 8.0% in infectious disease, and 10.9% in hematology (Supplementary  
10  
11 File 2).

### 12 13 14 15 16 **Evidence supporting the discordant recommendations**

17  
18 The comparator was clearly and explicitly stated in 73 (20.9%) of the 349  
19  
20 recommendations, not clearly but either obvious or relatively easy to infer in 230  
21  
22 (65.9%) and uncertain in 46 (13.2%). The direction of the recommendation was most  
23  
24 often framed in favor of the intervention (78.5%) rather than against it (Table 4).

25  
26  
27  
28 The full-text of the UpToDate topic often provided a rationale supporting the  
29  
30 recommendation. An explicit statement on the balance of benefits and harms was  
31  
32 present in 92 (26.4%), and an implicit statement in 157 (45.0%), and no statement in  
33  
34 100 (28.7%). Explicit statements addressing the relative importance of outcomes  
35  
36 and/or on patients' values and preferences in making the trade-offs between  
37  
38 alternatives were present in 10 (2.9%) of the recommendations; they could be inferred  
39  
40 in 171 (49.0%), but not in the remaining 168 (48.1%) of discordant recommendations.  
41  
42 Cost or resources considerations were mentioned in 15 (4.3%). The evidence cited to  
43  
44 support each discordant recommendation varied substantially, with a median of 4  
45  
46 references cited, range from 0 to 33, with 45 (12.9%) of recommendations without any  
47  
48 citation. Observational studies dominated (203, 58.2%); 49 (14.0%) were supported by  
49  
50 a systematic review (Table 4).

### Appropriateness of the discordant recommendations

Kappa for the initial taxonomic judgment regarding whether the recommendation was appropriate or inappropriate according to GRADE guidance was 0.46 (moderate agreement). The two reviewers required consensus discussions for 43% of the discordant recommendations. Third party adjudication to determine the appropriate classification was required in 12 of the discordant recommendations (3.4%).

Reviewers judged 204 (58.5%) of the 349 discordant recommendations to be consistent with one of the five paradigmatic situations in which it is appropriate to offer discordant recommendations (Table 5). The most common paradigm was a “life-threatening or potentially catastrophic situation”, followed by “potential similar benefits, one clearly less risky or costly”, “potential catastrophic harm”, “uncertain benefits, certain harm”, and “established similar benefits, one potentially more risky or costly” (Table 5).

Reviewers judged 47 (13.5%) of the 349 discordant recommendations as “good practice statements”; 38 (10.9%) as a “misclassification of certainty (evidence warranted moderate or high certainty)”; and 60 (17.2%) as warranting a weak recommendation (see Table 5).

## DISCUSSION

Among 9451 GRADE recommendations in UpToDate, about two thirds were formulated as weak recommendations and the remainder as strong recommendations. Of all recommendations, only 3.7% (n=349) were strong recommendations based on low certainty in effect estimates (Table 3). Of these discordant recommendations, over half were consistent with one of the five paradigmatic situations in which it is appropriate to offer discordant recommendations; approximately 14% represented “good practice statements”; approximately 11% were based on a misclassification of certainty (evidence warranted moderate or high certainty), and approximately 17% were judged to warrant a weak recommendation (Table 5). The proportion of appropriate discordant recommendations varied across intervention types or clinical fields (Supplementary File 2). Although most topics in UpToDate provided a rationale to support the discordant recommendation, 29% lacked statements about benefits and harms and 13% did not provide citations, which points at potential areas of improvement for UpToDate related to standards for trustworthy guidelines.<sup>1</sup>

### Strengths and limitations

This study assessed the strength of recommendations in the largest known sample of recommendations developed using GRADE. Indeed, even large guidelines include a few hundred recommendations<sup>18</sup>, whereas UpToDate topics have one of the largest known coverage in clinical fields and included 9451 recommendations at the time of this assessment.

The taxonomy that we used has been successfully implemented in two prior studies of clinical guidelines<sup>10 11</sup> (see below: relation to prior work). Our reviewers could all be



1  
2  
3 characterized as expert GRADE methodologists: they were clinical epidemiologists with  
4 an in-depth understanding of GRADE methodology acquired through use of GRADE in a  
5 large number of assessments over a period of years and were therefore well equipped to  
6 assess judgments on evidence and recommendations. This differs markedly from  
7 UpToDate authors (some with little understanding of GRADE) and UpToDate editors (all  
8 of whom have received basic GRADE training, but some little more than that). Despite  
9 the advanced skills of our reviewers, chance corrected kappa agreement on the  
10 appropriateness of recommendations was moderate (0.48).<sup>19</sup> Consensus discussions  
11 were needed for 43% of discordant recommendations, although formal adjudication by  
12 third parties was required for only 12 discordant recommendations (3.4%).  
13  
14  
15  
16  
17  
18  
19  
20  
21  
22  
23  
24

25  
26 The necessity for frequent consensus discussions reflects the substantial judgment  
27 required in categorizing recommendations. This is in part due to the narrative nature of  
28 UpToDate topics, which does not include formal summary of finding tables or evidence  
29 profiles<sup>17</sup>, often discussing the evidence and rationale for several recommendations in a  
30 free-text cross-referenced structure that sometimes omits statements regarding benefits  
31 and harms, and lacks citations. The one previous study using this taxonomy that  
32 addressed chance-corrected agreement reported a kappa of 0.68. The higher kappa may  
33 well be a result of more explicit reporting with use of summary of findings tables in the  
34 WHO guidelines that were the subject of investigation. The concern regarding the need  
35 for consensus discussions is perhaps increased because a single team using a single  
36 system of categorization undertook the study. A further limitation of our study is that  
37 decisions were based solely on information published in UpToDate, while authors of the  
38 topics may have considered other factors.<sup>20</sup>  
39  
40  
41  
42  
43  
44  
45  
46  
47  
48  
49  
50  
51  
52  
53  
54

55  
56 Another element contributing to the challenges in making categorizations is the clarity  
57 of the comparison on which the recommendation applies. As in previous assessment in  
58  
59  
60

1  
2  
3 guidelines<sup>9</sup>, the comparator was clearly and explicitly stated in only 73 (20.9%) of  
4  
5 discordant recommendations and was uncertain in 46 (13.2%). When comparators  
6  
7 were not clear and explicit, reviewers' inferences may not always have been correct.<sup>20</sup>  
8  
9

### 10 11 **Relation to previous work**

12  
13  
14 Two prior studies provided a formal structured exploration of discordant  
15  
16 recommendations using the GRADE approach. An assessment of 357 recommendations  
17  
18 in 17 Endocrine Society Guidelines found that only 29% of discordant recommendations  
19  
20 were consistent with one of the 5 paradigmatic situations.<sup>11</sup> A second study of 456  
21  
22 recommendations in 116 WHO guidelines using GRADE found that of 160 discordant  
23  
24 recommendations, only 15.6% were judged consistent with GRADE guidance.<sup>9 10</sup>  
25  
26  
27

28  
29 Our results contrast with these previous two studies. First, the proportion of weak  
30  
31 recommendations was approximately 30% higher in UpToDate than in WHO and  
32  
33 Endocrine Society guidelines. This proportion was, however, similar to the 9<sup>th</sup> edition  
34  
35 ACCP guideline on Antithrombotic Therapy and Prevention of Thrombosis, after it  
36  
37 implemented GRADE.<sup>18 21</sup> Second, the proportion of inappropriate, discordant  
38  
39 recommendation was considerably lower. Of the discordant recommendations, the  
40  
41 proportion that should have been weak was about 17%, rather than 27% (Endocrine  
42  
43 Society)<sup>11</sup> or 46% (WHO guidelines).<sup>9</sup>  
44  
45  
46

47  
48 A subsequent interview of panel members involved in the WHO guidelines highlighted  
49  
50 reasons contributing to discordant recommendations. These included political  
51  
52 considerations around long-established practices, the need for funding and policy  
53  
54 formulation, or the fear of pushback from media.<sup>20</sup> Panel members also expressed  
55  
56 skepticism regarding the value of making weak recommendations, or concerns they may  
57  
58  
59  
60

1  
2  
3 be ignored<sup>20</sup>, although another study reported that WHO weak recommendations are  
4 frequently adopted in national policies (uptake of 61% for weak recommendations  
5 versus 82% for strong recommendations).<sup>22</sup> Finally, the authors identified both financial  
6 and intellectual conflicts of interest among panel members as an explanation for  
7 discordant recommendations.<sup>20 23</sup> Any or all of these factors may have contributed to  
8 UpToDate discordant recommendations.  
9  
10  
11  
12  
13  
14  
15  
16  
17  
18

## 19 **Implications and conclusion**

20  
21 For users of UpToDate, our results are generally, though not absolutely, reassuring. The  
22 proportion of discordant recommendations is very small – only 3.7% of all  
23 recommendations. Furthermore, of the three categories inconsistent with GRADE  
24 guidance – good practice statement, misclassification of the certainty, and evidence  
25 warranting a weak recommendation (Table 2) – the third is by far the most  
26 problematic.<sup>9</sup> Good practice statements are appropriate when indirect evidence that is  
27 difficult to collect and summarize warrants high certainty in the impact of a given  
28 intervention and when the balance benefits and harms is large.<sup>14</sup> Thus, in terms of  
29 implications for clinical practice, good practice statements have the same force as strong  
30 recommendations. Similarly with misclassification of certainty: since the certainty is  
31 actually moderate or high, a strong recommendation is appropriate. Recommendations  
32 that should have been weak instead of strong provide inappropriate “just do it” guidance  
33 for clinical practice, although they are actually preference-sensitive and should thus  
34 warrant shared-decision making.<sup>8</sup> Of the 349 discordant recommendations in UpToDate,  
35 only 60 fall in the category of inappropriate strong recommendations.  
36  
37  
38  
39  
40  
41  
42  
43  
44  
45  
46  
47  
48  
49  
50  
51  
52  
53  
54

55 Thus, clinicians using UpToDate can anticipate that they will be misleadingly instructed  
56  
57  
58  
59  
60

1  
2  
3 to take a “just do it” rather than an “it depends” approach to clinical decision making in  
4  
5 0.6% (6 of 1,000) UpToDate recommendations.<sup>15</sup> This seems close to a threshold in  
6  
7 which one might ignore the problem. Nevertheless, we would still encourage clinicians  
8  
9 to be alert to the possibility of an inappropriate strong recommendation – in UpToDate  
10  
11 or elsewhere – whenever the recommendation is based on low certainty evidence and  
12  
13 authors fail to provide an explicit rationale corresponding to one of the categories in  
14  
15 Table 1.  
16  
17

18  
19 A likely explanation for UpToDate’s success in avoiding inappropriate discordant  
20  
21 recommendations is the training and feedback that their deputy editors receive. For  
22  
23 organizations using GRADE, our results suggest the desirability of such training for  
24  
25 those involved in formulating recommendations to optimize use of GRADE.  
26  
27

28  
29 Finally our results highlight the need for authors of trustworthy recommendations or  
30  
31 guidelines<sup>1</sup> to provide clear and explicit comparators, as well as transparent and  
32  
33 systematic reports of the key ingredients of their rationale when moving from evidence  
34  
35 to recommendation.<sup>17 24 25</sup> Future avenues for research should also look at optimal  
36  
37 presentation formats of EBM textbooks and guidelines, to ensure clinicians actually  
38  
39 understand both the rationale and potential implications of all recommendations for  
40  
41 clinical practice.<sup>8 26-29</sup>  
42  
43  
44  
45  
46  
47  
48  
49  
50  
51  
52  
53  
54  
55  
56  
57  
58  
59  
60

## LIST OF ABBREVIATIONS

GRADE: Grading of Recommendations Assessment, Development and Evaluation

WHO: World Health Organization

ACCP: American College of Chest Physicians

## COMPETING INTERESTS

TA, AK, IN, RBP, PEA, DR, POV, and GHG are active members of the GRADE working group.

DR, at the time the data on graded recommendations was extracted from UpToDate and until 2016, was an employee of UpToDate – he reports personal fees from UpToDate, outside the submitted work.

GHG contributes to the training in GRADE methods for UpToDate in-house deputy editors, for which he reports personal fees from UpToDate, outside the submitted work.

## CONTRIBUTORS

Thomas Agoritsas (TA) and Gordon H. Guyatt (GHG) designed the study. David Rind (DR) provided the list of all recommendations and grading from UpToDate. Paul E. Alexander (PEA) helped structuring data abstraction. Thomas Agoritsas (TA), Arnaud Merglen (AM), Anja F. Heen (AFH), Annette Kristiansen (AK), Ignacio Neumann (IN), Juan P. Brito (JPB), Romina Brignardello-Petersen (RBP), and Per O. Vandvik (POV) reviewed the recommendations in duplicate and classified them according to GRADE taxonomy. Thomas Agoritsas (TA) and Gordon Guyatt (GG) wrote the first draft of the manuscript. All authors have read the manuscripts and made improvements of the content and wording.

## FUNDING / ACKNOWLEDGMENTS

This research received no specific grant from any funding agency in the public, commercial or not-for-profit sectors.

## DATA SHARING STATEMENT

There were no additional unpublished data from this study.

## REFERENCES

1. Institute of Medicine (US) Committee on Standards for Developing Trustworthy Clinical Practice Guidelines. . In: Graham R, Mancher M, Miller Wolman D, et al., eds. Clinical Practice Guidelines We Can Trust. Washington (DC), 2011.
2. Guyatt GH, Oxman AD, Vist GE, et al. GRADE: an emerging consensus on rating quality of evidence and strength of recommendations. *BMJ* 2008;**336**(7650):924-6.
3. Guyatt G, Oxman AD, Akl EA, et al. GRADE guidelines: 1. Introduction-GRADE evidence profiles and summary of findings tables. *J Clin Epidemiol* 2011;**64**(4):383-94.
4. Alonso-Coello P, Schunemann HJ, Moher J, et al. GRADE Evidence to Decision (EtD) frameworks: a systematic and transparent approach to making well informed healthcare choices. 1: Introduction. *BMJ* 2016;**353**:i2016.
5. Alonso-Coello P, Oxman AD, Moher J, et al. GRADE Evidence to Decision (EtD) frameworks: a systematic and transparent approach to making well informed healthcare choices. 2: Clinical practice guidelines. *BMJ* 2016;**353**:i2089.
6. Andrews J, Guyatt G, Oxman AD, et al. GRADE guidelines: 15. Going from evidence to recommendations: the significance and presentation of recommendations. *J Clin Epidemiol* 2013.
7. Balshem H, Helfand M, Schunemann HJ, et al. GRADE guidelines: 3. Rating the quality of evidence. *J Clin Epidemiol* 2011;**64**(4):401-6.
8. Agoritsas T, Heen AF, Brandt L, et al. Decision aids that really promote shared decision making: the pace quickens. *BMJ* 2015;**350**:g7624.
9. Alexander PE, Brito JP, Neumann I, et al. World Health Organization strong recommendations based on low-quality evidence (study quality) are frequent and often inconsistent with GRADE guidance. *J Clin Epidemiol* 2016;**72**:98-106.
10. Alexander PE, Bero L, Montori VM, et al. World Health Organization recommendations are often strong based on low confidence in effect estimates. *J Clin Epidemiol* 2014;**67**(6):629-34.
11. Brito JP, Domecq JP, Murad MH, et al. The Endocrine Society guidelines: when the confidence cart goes before the evidence horse. *The Journal of clinical endocrinology and metabolism* 2013;**98**(8):3246-52.
12. Vigersky RA, Bhasin S, Martin KA. The Endocrine Society Clinical Practice Guidelines: a self-assessment. *The Journal of clinical endocrinology and metabolism* 2013;**98**(8):3174-7.
13. Neumann I, Santesso N, Akl EA, et al. A guide for health professionals to interpret and use recommendations in guidelines developed with the GRADE approach. *J Clin Epidemiol* 2016;**72**:45-55.

14. Guyatt GH, Schunemann HJ, Djulbegovic B, et al. Guideline panels should not GRADE good practice statements. *J Clin Epidemiol* 2014.
15. UpToDate, Waltham, MA. <http://www.uptodate.com> (Accessed on July 7th, 2017).
16. Agoritsas T, Vandvik PO, Neumann I, Rochwerg B, Jaeschke R, Hayward R, Guyatt GH, McKibbin A. Chapter 5. Finding Current Best Evidence, in *JAMA Users' Guides to the Medical Literature: A Manual for Evidence-Based Clinical Practice*, 3rd Edition, McGraw-Hill Medical, 2015.
17. Guyatt G, Oxman AD, Akl E, et al. GRADE guidelines 1. Introduction-GRADE evidence profiles and summary of findings tables. *J Clin Epidemiol* 2010.
18. Agoritsas T, Neumann I, Mendoza C, et al. Guideline conflict of interest management and methodology heavily impacts on the strength of recommendations: comparison between two iterations of the American College of Chest Physicians Antithrombotic Guidelines. *J Clin Epidemiol* 2017;**81**:141-43.
19. Landis JR, Koch GG. The measurement of observer agreement for categorical data. *Biometrics* 1977;**33**(1):159-74.
20. Alexander PE, Gionfriddo MR, Li SA, et al. A number of factors explain why WHO guideline developers make strong recommendations inconsistent with GRADE guidance. *J Clin Epidemiol* 2016;**70**:111-22.
21. Guyatt GH, Norris SL, Schulman S, et al. Methodology for the development of antithrombotic therapy and prevention of thrombosis guidelines: Antithrombotic Therapy and Prevention of Thrombosis, 9th ed: American College of Chest Physicians Evidence-Based Clinical Practice Guidelines. *Chest* 2012;**141**(2 Suppl):53S-70S.
22. Nasser SM, Cooke G, Kranzer K, et al. Strength of recommendations in WHO guidelines using GRADE was associated with uptake in national policy. *J Clin Epidemiol* 2015;**68**(6):703-7.
23. Alexander PE, Li SA, Gionfriddo MR, et al. Senior GRADE methodologists encounter challenges as part of WHO guideline development panels: an inductive content analysis. *J Clin Epidemiol* 2016;**70**:123-8.
24. Guyatt GH, Oxman AD, Kunz R, et al. GRADE guidelines: 2. Framing the question and deciding on important outcomes. *J Clin Epidemiol* 2011;**64**(4):395-400.
25. Guyatt GH, Oxman AD, Kunz R, et al. Going from evidence to recommendations. *BMJ* 2008;**336**(7652):1049-51.
26. Vandvik PO, Brandt L, Alonso-Coello P, et al. Creating clinical practice guidelines we can trust, use, and share: a new era is imminent. *Chest* 2013;**144**(2):381-9.
27. Kristiansen A, Brandt L, Alonso-Coello P, et al. Development of a novel multilayered

1  
2  
3 presentation format for clinical practice guidelines. Chest 2014.

4  
5 28. Treweek S, Oxman AD, Alderson P, et al. Developing and evaluating communication strategies  
6 to support informed decisions and practice based on evidence (DECIDE): protocol and  
7 preliminary results. Implement Sci 2013;**8**:6.

8  
9  
10 29. Siemieniuk RA, Agoritsas T, Macdonald H, et al. Introduction to BMJ Rapid Recommendations.  
11 BMJ 2016;**354**:i5191.  
12  
13  
14  
15  
16  
17  
18  
19  
20  
21  
22  
23  
24  
25  
26  
27  
28  
29  
30  
31  
32  
33  
34  
35  
36  
37  
38  
39  
40  
41  
42  
43  
44  
45  
46  
47  
48  
49  
50  
51  
52  
53  
54  
55  
56  
57  
58  
59  
60



1  
2  
3  
4  
5  
6  
7  
8  
9  
10  
11  
12  
13  
14  
15  
16  
17  
18  
19  
20  
21  
22  
23  
24  
25  
26  
27  
28  
29  
30  
31  
32  
33  
34  
35  
36  
37  
38  
39  
40  
41  
42  
43  
44  
45  
46  
47  
48  
49

**Table 1. Paradigmatic situations in which a strong recommendation may be warranted despite low or very low certainty in effect estimates (appropriate strength, consistent with GRADE)**

| Situation                                                                                 | Certainty in Estimates (Quality of Evidence) |                               | Balance of Benefits and Harms                                                                                                                                                 | Values and Preferences                                                                                                | Resource Considerations                                                                                  | Recommendation                                                            | Example                                                                                                                                                                                                                                                                                                                                                                                                                                                                                               |
|-------------------------------------------------------------------------------------------|----------------------------------------------|-------------------------------|-------------------------------------------------------------------------------------------------------------------------------------------------------------------------------|-----------------------------------------------------------------------------------------------------------------------|----------------------------------------------------------------------------------------------------------|---------------------------------------------------------------------------|-------------------------------------------------------------------------------------------------------------------------------------------------------------------------------------------------------------------------------------------------------------------------------------------------------------------------------------------------------------------------------------------------------------------------------------------------------------------------------------------------------|
|                                                                                           | Benefits                                     | Harms                         |                                                                                                                                                                               |                                                                                                                       |                                                                                                          |                                                                           |                                                                                                                                                                                                                                                                                                                                                                                                                                                                                                       |
| <b>1. Life-threatening (or catastrophic) situation</b>                                    | Low or very low                              | Immaterial (very low to high) | Intervention may reduce mortality in a life-threatening situation; adverse events not prohibitive                                                                             | A very high value is placed on an uncertain but potentially life-preserving benefit                                   | Small incremental cost (or resource use) relative to the benefits justify the intervention               | Strong recommendation in favor of the intervention                        | Indirect evidence from seasonal influenza suggests that patients with avian influenza may benefit from the use of oseltamivir (low certainty in effect estimates). Given the high mortality of the disease and the absence of effective alternatives, the WHO made a strong recommendation in favor of the use of oseltamivir rather than no treatment in patients with avian influenza.                                                                                                              |
| <b>2. Uncertain benefit, certain harm</b>                                                 | Low or very low                              | High or moderate              | Possible but uncertain benefit; substantial established harm                                                                                                                  | A much higher value is placed on the adverse events in which we are confident than in the benefit, which is uncertain | High incremental cost (or resource use) relative to the benefits may not justify the intervention        | Strong recommendation against the intervention                            | In patients with idiopathic pulmonary fibrosis, treatment with azathioprine plus prednisone offers a possible but uncertain benefit in comparison with no treatment. The intervention, however, is associated with a substantial established harm. An international guideline made a recommendation against the combination of corticosteroids plus azathioprine in patients with idiopathic pulmonary fibrosis.                                                                                      |
| <b>3. Potential equivalence, one option clearly less risky or costly</b>                  | Low or very low                              | High or moderate              | Magnitude of benefit apparently similar—though uncertain—for alternatives; we are confident less harm or cost for one of the competing alternatives                           | A high value is placed on the reduction in harm                                                                       | High incremental cost (or resource use) relative to the benefits may not justify one of the alternatives | Strong recommendation for less harmful/less expensive                     | Low-quality evidence suggests that initial <i>Helicobacter pylori</i> eradication in patients with early stage extranodal marginal zone (MALT) B-cell lymphoma results in similar rates of complete response in comparison with the alternatives of radiation therapy or gastrectomy, but with high certainty of less harm, morbidity, and cost. Consequently, UpToDate made a strong recommendation in favor of <i>H pylori</i> eradication rather than radiotherapy in patients with MALT lymphoma. |
| <b>4. High certainty in similar benefits, one option potentially more risky or costly</b> | High or moderate                             | Low or very low               | Established that magnitude of benefit is similar for alternative management strategies; best (though uncertain) estimate is that one alternative has appreciably greater harm | A high value is placed on avoiding the potential increase in harm                                                     | High incremental cost (or resource use) relative to the benefits may not justify one of the alternatives | Strong recommendation against the intervention with possible greater harm | In women requiring anticoagulation and planning conception or in pregnancy, high certainty estimates suggest similar effects of different anticoagulants. However, indirect evidence (low certainty in effect estimates) suggests potential harm to the unborn infant with oral direct thrombin (eg, dabigatran) and factor Xa inhibitors (eg, rivaroxaban, apixaban). The AT9 guidelines recommended against the use of such anticoagulants in women planning conception or in pregnancy.            |
| <b>5. Potential catastrophic harm</b>                                                     | Immaterial (very low to high)                | Low or very low               | Potential important harm of the intervention, magnitude of benefit is variable                                                                                                | A high value is placed on avoiding potential increase in harm                                                         | High incremental cost (or resource use) relative to the benefits, may not justify the intervention       | Strong recommendation against the intervention                            | In males with androgen deficiency, testosterone supplementation likely improves quality of life. Low- certainty evidence suggests that testosterone increases cancer spread in patients with prostate cancer. The US Endocrine Society made a recommendation against testosterone supplementation in patients with prostate cancer.                                                                                                                                                                   |

Reproduced and adapted from Neumann & al.<sup>13</sup>

**Table 2. Reasons for issuing strong recommendation based on low certainty in effect estimates inconsistent with GRADE guidance**

| Situation                                                                                                                  | Example                                                                                                                                                                                                                                                                                                            |
|----------------------------------------------------------------------------------------------------------------------------|--------------------------------------------------------------------------------------------------------------------------------------------------------------------------------------------------------------------------------------------------------------------------------------------------------------------|
| <b>Best practice recommendation</b><br>(for which sensible alternatives do not exist)                                      | "For patients with congenital adrenal hyperplasia, we recommend monitoring patients for signs of glucocorticoid excess, as well as for signs of inadequate androgen suppression." This statement should not have been GRADEed as sensible alternatives do not exist                                                |
| <b>The strong recommendation was warranted because the certainty of the evidence was actually moderate rather than low</b> | "We recommend intensive lifestyle modification to the entire family and to the patient, and as the prerequisite for all overweight and obesity treatments for children and adolescents." The authors classified this as low quality evidence; our judgment is that the correct classification is moderate quality. |
| <b>Lack of compelling explanation</b><br>(the recommendation should have been weak)                                        | "If a patient is unable or unwilling to undergo surgery, we recommend medical treatment with mineralocorticoids" Lack of evidence of mineralocorticoids being superior to other medical treatment (eg, anti-hypertensive medications)                                                                              |

Elements adapted from Brito et al.<sup>11</sup>

**Table 3. Distribution of the strength of the recommendations in UpToDate according to the certainty in evidence**

|                           | <b>Weak<br/>Recommendations</b> | <b>Strong<br/>Recommendations</b> | <b>All<br/>Recommendations</b> |
|---------------------------|---------------------------------|-----------------------------------|--------------------------------|
|                           | <b>N (%)</b>                    | <b>N (%)</b>                      | <b>N (%)</b>                   |
| <b>Low certainty</b>      | 4335 (66.7%)                    | 366 (12.4%)                       | 4701 (49.7%)                   |
| <b>Moderate certainty</b> | 2019 (31.1%)                    | 1740 (59.0%)                      | 3759 (39.8%)                   |
| <b>High certainty</b>     | 147 (2.3%)                      | 844 (28.6%)                       | 991 (10.5%)                    |
| <b>Total</b>              | <b>6501</b>                     | <b>2950</b>                       | <b>9451</b>                    |
|                           | <b>(68.8% of all rec)</b>       | <b>(31.2% of all rec)</b>         | <b>(100%)</b>                  |

**Table 4. Characteristics of all 349 discordant recommendations in UpToDate, and proportion of appropriate discordant recommendations**

|                                                                                       | N (%)      | % of appropriate discordant<br>( <i>p</i> -value) |
|---------------------------------------------------------------------------------------|------------|---------------------------------------------------|
| <b>Clinical Specialties</b>                                                           |            | ( <i>p</i> = 0.160) *                             |
| Primary Care and General Internal Medicine                                            | 15 (4.3)   | 53.3                                              |
| Emergency Medicine                                                                    | 16 (4.6)   | 81.3                                              |
| Critical Care                                                                         | 5 (1.4)    | 80.0                                              |
| Internal Medicine specialties                                                         | 158 (45.3) | 57.6                                              |
| Oncology (including hemato-oncology)                                                  | 43 (12.3)  | 55.8                                              |
| Pediatrics                                                                            | 73 (20.9)  | 47.9                                              |
| Obstetrics, Gynecology and Women Health                                               | 19 (5.4)   | 73.7                                              |
| General Surgery                                                                       | 13 (3.7)   | 69.2                                              |
| Anesthesiology                                                                        | 3 (0.9)    | 100.0                                             |
| Psychiatry                                                                            | 4 (1.1)    | 75.0                                              |
| <b>Intervention type</b>                                                              |            | ( <i>p</i> = 0.010)                               |
| Drug intervention                                                                     | 197 (56.4) | 61.4                                              |
| Surgical interventions                                                                | 69 (19.8)  | 59.4                                              |
| Medical device                                                                        | 24 (6.9)   | 62.5                                              |
| Behavioural or multi-disciplinary intervention                                        | 35 (10.0)  | 57.1                                              |
| Diagnostic test, screening programmes                                                 | 24 (6.9)   | 29.2                                              |
| <b>Clarity of the comparator</b>                                                      |            | ( <i>p</i> < 0.001)                               |
| Comparator not at all clear – uncertain                                               | 46 (13.2)  | 37.0                                              |
| Comparator not clearly and explicitly stated or obvious, but relatively easy to infer | 120 (34.4) | 48.3                                              |
| Comparator not clearly and explicitly stated, but obvious                             | 110 (31.5) | 68.2                                              |
| Comparator clearly and explicitly stated                                              | 73 (20.9)  | 74.0                                              |
| <b>Type of comparator</b>                                                             |            | ( <i>p</i> = 0.083)                               |
| Too unclear                                                                           | 25 (7.2)   | 44.0                                              |
| No intervention (or placebo)                                                          | 126 (36.1) | 54.0                                              |
| Other intervention(s) (standard of care or alternative(s))                            | 198 (56.7) | 63.1                                              |
| <b>Direction of the recommendation</b>                                                |            | ( <i>p</i> < 0.001)                               |
| For the intervention (i.e. against the comparator)                                    | 274 (78.5) | 51.1                                              |
| Against the intervention (i.e. for the comparator)                                    | 75 (21.5)  | 85.3                                              |
| <b>Mortality</b>                                                                      |            | ( <i>p</i> < 0.001)                               |
| No statement about mortality                                                          | 189 (54.2) | 47.1                                              |
| Implicit statement about mortality                                                    | 47 (13.5)  | 68.1                                              |
| Explicit statement about mortality                                                    | 113 (32.4) | 73.5                                              |
| <b>Balance of benefits and harms</b>                                                  |            | ( <i>p</i> < 0.001)                               |
| No statement about the balance of outcomes                                            | 100 (28.7) | 28.0                                              |
| Implicit statement about the balance of outcomes                                      | 157 (45.0) | 66.9                                              |
| Explicit statement about the balance of outcomes                                      | 92 (26.4)  | 77.2                                              |

|    |                                                                   |                  |                     |
|----|-------------------------------------------------------------------|------------------|---------------------|
| 1  |                                                                   |                  |                     |
| 2  |                                                                   |                  |                     |
| 3  |                                                                   |                  |                     |
| 4  | <b>Relative Importance of outcomes - Values &amp; Preferences</b> |                  | ( <i>p</i> < 0.001) |
| 5  | No statement about the relative importance of outcomes            | 168 (48.1)       | 42.9                |
| 6  | Implicit statement about the relative importance of outcomes      | 171 (49.0)       | 73.1                |
| 7  | Explicit statement about the relative importance of outcomes      | 10 (2.9)         | 70.0                |
| 8  |                                                                   |                  |                     |
| 9  | <b>Cost of resources</b>                                          |                  | ( <i>p</i> = 0.023) |
| 10 | No statement about cost or resources                              | 334 (95.7)       | 57.2                |
| 11 | Cost or resources clearly and explicitly stated                   | 15 (4.3)         | 86.7                |
| 12 |                                                                   |                  |                     |
| 13 | <b>Supporting systematic review (SR)</b>                          |                  | ( <i>p</i> = 0.175) |
| 14 | No SR is cited                                                    | 300 (86.0)       | 56.3                |
| 15 | SR of Observational studies                                       | 22 (6.3)         | 63.6                |
| 16 | SR of both RCT and Observational studies                          | 13 (3.7)         | 76.9                |
| 17 | SR of Randomized Trials (RCT)                                     | 14 (4.0)         | 78.6                |
| 18 |                                                                   |                  |                     |
| 19 | <b>Design of primary studies</b>                                  |                  | ( <i>p</i> = 0.002) |
| 20 | No reference cited                                                | 45 (12.9)        | 35.6                |
| 21 | Other type (eg narrative review, book chapter)                    | 48 (13.8)        | 54.2                |
| 22 | Observational studies                                             | 203 (58.2)       | 61.1                |
| 23 | Randomized Trials (RCT)                                           | 53 (15.2)        | 71.7                |
| 24 |                                                                   |                  |                     |
| 25 | <b>Total</b>                                                      | <b>349 (100)</b> | <b>58.5</b>         |
| 26 |                                                                   |                  |                     |

\* The null hypothesis for the p-value is that the proportions do not differ across categories.

**Table 5. Summary judgments on the appropriateness of 349 discordant strong recommendation based on low certainty in effect in UpToDate**

|                                                                           | N (%)             |
|---------------------------------------------------------------------------|-------------------|
| <b>Appropriate discordant recommendations (consistent with GRADE)</b>     |                   |
| 1. Life-threatening (or catastrophic) situation                           | 70 (20.1)         |
| 2. Uncertain Benefit, Certain Harm                                        | 28 (8.0)          |
| 3. Potential similar benefits, One clearly less risky (or costly)         | 56 (16.0)         |
| 4. Established similar benefits, One potentially more risky (or costly)   | 18 (5.2)          |
| 5. Potential catastrophic harm                                            | 32 (9.2)          |
| Total                                                                     | <b>204 (58.5)</b> |
| <b>Inappropriate discordant recommendations (inconsistent with GRADE)</b> |                   |
| 6. Good Practice Statement                                                | 47 (13.5)         |
| 7. Misclassification of certainty (judged moderate or high)               | 38 (10.9)         |
| 8. Lack of explanation, should have been weak recommendation (GRADE 2C)   | 60 (17.2)         |
| Total                                                                     | <b>145 (41.5)</b> |

## Supplementary File 1. INSTRUCTION FOR ABSTRACTION

*Please read carefully before starting abstraction.*

*For any questions please contact me ASAP ([thomas.agoritsas@gmail.com](mailto:thomas.agoritsas@gmail.com))*

### Background

- In a first phase of the project, we characterized the strength and confidence of the 9451 GRADE recommendations in UTD.
- In this last phase, we are focusing on
  - The **349 strong recommendations based on low confidence (GRADE 1C)**
  - Which are included in a total of **274 topics** (=chapters in UpToDate).
- The main objective is to categorize them based according the following taxonomy
  - Appropriate grading: recommendation consistent with one of the five paradigmatic situations defined the GRADE framework ([see examples in Table 1 below](#)):
    - [App#1] *Life-threatening situation*
    - [App#2] *Uncertain Benefit, Certain Harm*
    - [App#3] *Potential similar benefits, one clearly less risky (or costly)*
    - [App#4] *Established similar benefits, one potentially more risky (or costly)*
    - [App#5] *Potential catastrophic harm of one option*
  - Inappropriate grading: recommendation inconsistent with GRADE ([see examples in Table 2 below](#)), in short:
    - [Inapp#1] *Good Practice Statement*
    - [Inapp#2] *Misclassification of confidence (should have been GRADE 1B or 1A)*
    - [Inapp#3] *Lack of explanation, should have been a weak rec (GRADE 2C)*

→ Before starting, please read the examples and [Appendix Tables 1 & 2](#), they are also embedded in separate tabs in the abstraction excel file. Do not focus on memorizing them, as data abstraction will guide you in your judgment.

### Abstraction Excel File & Variables

- We will conduct the whole abstraction process in the attached standardized excel file
- We have kept the variables to abstract to the minimum necessary, most with **pre-defined response categories in drop-down menus** (and infrequently as free-text for copy-pasting).
- **Each recommendation has a separate row in the file.** There are sometimes more than GRADE 1C per UTD topic (the number are indicated).
- **As a guiding principle, keep in mind that the main objective is to assess the most appropriate taxonomy (first as appropriate or inappropriate, then subcategory).**  
**These are the last variables in the file.**
- This requires judgment based on what is reported in the UpToDate topic, mostly in narrative form. Indeed, there are typically no “summary of findings tables” of “evidence profiles” to explicit GRADE assessment. Absolute certainty in taxonomy is sometimes hard to achieve, but try and assign the best fit you can.
- The abstraction form is organized as follows to guide your final judgment:

|                                 |                                                                                                                                                                              |
|---------------------------------|------------------------------------------------------------------------------------------------------------------------------------------------------------------------------|
| UpToDate TOPIC & RECOMMENDATION | Pre-entered data to help you identify the relevant topic in the UpToDate topic in the dropbox                                                                                |
| POPULATION                      | Check pre-entered clinical field, document age-group                                                                                                                         |
| INTERVENTION                    | Intervention type                                                                                                                                                            |
| COMPARATOR                      | Clarity and type of the comparator, direction of rec                                                                                                                         |
| OUTCOME – Benefits & Harms      | Statement about: mortality, balance of benefits & harms, their relative importance (ie. values/preferences), cost                                                            |
| EVIDENCE supporting the rec     | Date of literature review & updates<br>number and type of supporting evidence<br>Indication regarding the potential role of indirect evidence,<br>Presence of large effects. |
| Conflict of interest (COI)      | Copy paste statement, presence of financial COI                                                                                                                              |
| TAXONOMY – APPROPRIATE          | <b>Separate judgement on each of the 5 paradigmatic situation defined by GRADE</b><br>(clear, possible, no)                                                                  |
| TAXONOMY – INAPPROPRIATE        | <b>Separate judgment on each of the 3 inappropriate situations</b>                                                                                                           |
| CONFLICT RESOLUTION             | <b>TAXONOMY DECISION</b> (for kappa),<br>confidence in the decision (to document),<br>assessing agreement and <b>RECONCILED TAXONOMY</b> within each pair of abstractor.     |
| ADJUDICATION                    | Recording adjudication third reviewer if this was necessary                                                                                                                  |

- **Specific guidance for each variable is found in the GREY BOXES on top of each column.**
- **Please read and select best option from DROP-DOWN menus within each cell**
- A few cells are for free-text to copy paste from the topic. Be sure to double click in the cell before pasting content, to keep the format intact.
- Most variables are followed by a column labelled “**additional comments**” or “rationale”. These are for your personal notes to guide conflict resolution.
- A few examples already abstracted are shown in the first rows as an indication.

### **Abstraction: STEP-BY-STEP**

**Start abstracting a few first recommendations to get familiar with the process and contact me ([thomas.agoritsas@gmail.com](mailto:thomas.agoritsas@gmail.com)) for any question. I'm happy to have a quick skype if and as often as necessary.**

- Go to the recommendation in the next row in the excel file.
- The [topic\_#] and [topic\_title] correspond to the name of the **PDF file** for the corresponding UTD topic → Open it.
- **Search automatically (ctrl-R or command-F) for “1C” → This will directly lead you to the GRADE 1C recommendation(s) at the end of the topic under the “Summary and Recommendations” section.**
- Read it carefully, and take a few seconds to try and get some first rough impression re: potential taxonomy
- **Then, find the corresponding paragraph in the topic that supports the recommendation** (it is often indicated soon after the recommendation (e.g. “See treatment...”). If not, try and find which paragraph(s) discuss(es) the recommendation.
- Abstract all variables in the order of the file as this will guide your formal judgment.
- Then judge each of the 5 appropriate and 3 inappropriate categories in the taxonomy.
- Then decide which one fits best and document the confidence you have in your assessment.
- Go to the next recommendation in the next row. (if this is in the same topic, you'll be able to copy several or your answers.



## ***Conflict resolution and adjudication***

- **You've been assigned with a paired reviewer. Schedule a first conflict resolution in the following days to ensure you are on the same page.**
- Record the agreed taxonomy in the specific column ("RECONCILED TAXONOMY"). Do NOT modify your initial judgement ("TAXONOMY DECISION") - as this will use to calculate kappa.
- **If you cannot resolve conflict, send us your questions for adjudication by a third reviewer.**
- Record adjudication in the final column.

➤ **Thanks again for your help. Do not hesitate to contact me for any questions ([thomas.agoritsas@gmail.com](mailto:thomas.agoritsas@gmail.com))**

**Supplementary File 2.****Characteristics of all 9451 recommendations in UpToDate: certainty effect estimates and clinical fields**

|                                            | N (%)             | % of Strong Rec | % of strong rec discordant | % of any rec being discordant |
|--------------------------------------------|-------------------|-----------------|----------------------------|-------------------------------|
| <i>Clinical Fields</i>                     |                   |                 |                            |                               |
| 1 Primary Care & General Internal Medicine | 356 (3.8)         | 22.5            | 16.3                       | 3.7                           |
| 2 Emergency Medicine                       | 295 (3.1)         | 25.1            | <b>23.0</b>                | <b>5.8</b>                    |
| 3 Critical Care                            | 144 (1.5)         | 34.0            | 10.2                       | 3.5                           |
| 4 Cardiovascular Medicine                  | 529 (5.6)         | <b>42.7</b>     | 5.3                        | 2.3                           |
| 5 Infectious Diseases                      | 870 (9.2)         | <b>41.3</b>     | <b>19.5</b>                | <b>8.0</b>                    |
| 6 Nephrology and Hypertension              | 475 (5.0)         | <b>39.8</b>     | 6.3                        | 2.5                           |
| 7 Pulmonary Medicine                       | 347 (3.7)         | 34.6            | 6.7                        | 2.3                           |
| 8 Hematology (non-oncology)                | 192 (2.0)         | <b>41.1</b>     | <b>26.6</b>                | <b>10.9</b>                   |
| 9 Neurology                                | 395 (4.2)         | 31.1            | <b>17.9</b>                | <b>5.6</b>                    |
| 10 Allergy and Immunology                  | 261 (2.8)         | 23.4            | 3.3                        | 0.8                           |
| 11 Endocrinology & Diabetes                | 504 (5.3)         | 19.0            | 6.3                        | 1.2                           |
| 12 Gastroenterology & Hepatology           | 471 (5.0)         | 22.9            | 7.4                        | 1.7                           |
| 13 Rheumatology                            | 216 (2.3)         | 21.3            | 4.3                        | 0.9                           |
| 14 Palliative Care                         | 33 (0.3)          | 18.2            | 0.0                        | 0.0                           |
| 15 Oncology                                | 1255 (13.3)       | <b>36.0</b>     | 7.7                        | 2.8                           |
| 16 Hemato-oncology                         | 263 (2.8)         | 27.8            | <b>20.5</b>                | <b>5.7</b>                    |
| 17 Pediatrics                              | 1057 (11.2)       | <b>39.5</b>     | <b>17.7</b>                | <b>7.0</b>                    |
| 18 Pediatric Emergency Medicine            | 126 (1.3)         | 28.6            | 5.6                        | 1.6                           |
| 19 Gynecology & Obstetrics                 | 709 (7.5)         | 22.3            | 12.0                       | 2.7                           |
| 20 General Surgery                         | 403 (4.3)         | <b>32.8</b>     | 12.1                       | 4.0                           |
| 21 Anesthesiology                          | 48 (0.5)          | 16.7            | <b>37.5</b>                | <b>6.3</b>                    |
| 22 Dermatology                             | 240 (2.5)         | 5.8             | 0.0                        | 0.0                           |
| 23 Psychiatry                              | 262 (2.8)         | 16.8            | 9.1                        | 1.5                           |
| <b>TOTAL</b>                               | <b>9451 (100)</b> | <b>31.2</b>     | <b>12.4</b>                | <b>3.9</b>                    |

# BMJ Open

## UpToDate adherence to GRADE criteria for strong recommendations: an analytic survey

|                                 |                                                                                                                                                                                                                                                                                                                                                                                                                                                                                                                                                                                                                                                                                                                                                                                                                                                                                                                                                                                                                                                                                                                                                                                                                                                         |
|---------------------------------|---------------------------------------------------------------------------------------------------------------------------------------------------------------------------------------------------------------------------------------------------------------------------------------------------------------------------------------------------------------------------------------------------------------------------------------------------------------------------------------------------------------------------------------------------------------------------------------------------------------------------------------------------------------------------------------------------------------------------------------------------------------------------------------------------------------------------------------------------------------------------------------------------------------------------------------------------------------------------------------------------------------------------------------------------------------------------------------------------------------------------------------------------------------------------------------------------------------------------------------------------------|
| Journal:                        | <i>BMJ Open</i>                                                                                                                                                                                                                                                                                                                                                                                                                                                                                                                                                                                                                                                                                                                                                                                                                                                                                                                                                                                                                                                                                                                                                                                                                                         |
| Manuscript ID                   | bmjopen-2017-018593.R2                                                                                                                                                                                                                                                                                                                                                                                                                                                                                                                                                                                                                                                                                                                                                                                                                                                                                                                                                                                                                                                                                                                                                                                                                                  |
| Article Type:                   | Research                                                                                                                                                                                                                                                                                                                                                                                                                                                                                                                                                                                                                                                                                                                                                                                                                                                                                                                                                                                                                                                                                                                                                                                                                                                |
| Date Submitted by the Author:   | 24-Sep-2017                                                                                                                                                                                                                                                                                                                                                                                                                                                                                                                                                                                                                                                                                                                                                                                                                                                                                                                                                                                                                                                                                                                                                                                                                                             |
| Complete List of Authors:       | Agoritsas, Thomas; University Hospitals of Geneva, Division of General Internal Medicine & Division of Clinical Epidemiology; McMaster University Faculty of Health Sciences, Department of Health Research Methods, Evidence, and Impact<br>Merglen, Arnaud; University Hospitals of Geneva, Division of General Pediatrics<br>Heen, Anja; Innlandet Hospital Trust-division Gjøvik, Department of Internal Medicine<br>Kristiansen, Annette; Inland hospital trust, Internal medicine, Gjøvik<br>Neumann, Ignacio; Pontificia Universidad Catolica de Chile, Department of Internal Medicine; McMaster University, Department of Health Research Methods, Evidence, and Impact,<br>Brito, Juan; Mayo Clinic Minnesota, Department of Medicine and Knowledge and Evaluation Research Unit,<br>Brignardello-Petersen, Romina; McMaster University, Department of Health Research Methods, Evidence, and Impact<br>Alexander, Paul; McMaster University, Department of Health Research Methods, Evidence, and Impact<br>Rind, David; Institute for Clinical and Economic Review<br>Vandvik, Per; Norwegian Knowledge Centre for the Health Services,<br>Guyatt, Gordon; McMaster University, Department of Health Research Methods, Evidence, and Impact |
| <b>Primary Subject Heading</b>: | Evidence based practice                                                                                                                                                                                                                                                                                                                                                                                                                                                                                                                                                                                                                                                                                                                                                                                                                                                                                                                                                                                                                                                                                                                                                                                                                                 |
| Secondary Subject Heading:      | Epidemiology                                                                                                                                                                                                                                                                                                                                                                                                                                                                                                                                                                                                                                                                                                                                                                                                                                                                                                                                                                                                                                                                                                                                                                                                                                            |
| Keywords:                       | Clinical Practice Guidelines, Strength of Recommendations, Quality of the Evidence, Clinical Decision Making, Evidence-Based Medicine                                                                                                                                                                                                                                                                                                                                                                                                                                                                                                                                                                                                                                                                                                                                                                                                                                                                                                                                                                                                                                                                                                                   |
|                                 |                                                                                                                                                                                                                                                                                                                                                                                                                                                                                                                                                                                                                                                                                                                                                                                                                                                                                                                                                                                                                                                                                                                                                                                                                                                         |

SCHOLARONE™  
Manuscripts

1  
2  
3  
4 **UpToDate adherence to GRADE criteria for strong recommendations: an**  
5  
6 **analytic survey**  
7  
8

9 Thomas Agoritsas, MD, PhD <sup>1,2</sup>

10 Arnaud Merglen, MD, MSc <sup>3</sup>

11 Anja Fog Heen, MD <sup>4</sup>

12 Annette Kristiansen, MD, PhD <sup>4</sup>

13 Ignacio Neumann, MD, PhD <sup>2,5</sup>

14 Juan P Brito, MD, MSc <sup>6</sup>

15 Romina Brignardello-Petersen, DDS, MSc, PhD <sup>2,7</sup>

16 Paul E Alexander, MSc, PhD <sup>2</sup>

17 David M Rind, MD, MSc <sup>8</sup>

18 Per O. Vandvik, MD, PhD <sup>4,9</sup>

19 Gordon H Guyatt, MD, MSc <sup>2</sup>

20  
21  
22  
23  
24  
25  
26  
27  
28  
29  
30  
31  
32  
33  
34  
35  
36  
37  
38  
39  
40  
41 **Affiliations:**

42  
43 <sup>1</sup> Division of General Internal Medicine & Division of Clinical Epidemiology, University Hospitals of  
44 Geneva, Geneva, Switzerland.

45  
46  
47  
48 <sup>2</sup> Department of Health Research Methods, Evidence, and Impact, McMaster University, Faculty of Health  
49 Sciences, Hamilton, Ontario, Canada

50  
51  
52  
53 <sup>3</sup> Division of General Pediatrics, University Hospitals of Geneva & Faculty of Medicine, University of  
54 Geneva, Geneva, Switzerland.

55  
56  
57  
58 <sup>4</sup> Department of Internal Medicine, Innlandet Hospital Trust-division Gjøvik, Norway

1  
2  
3  
4  
5  
6  
7  
8  
9  
10  
11  
12  
13  
14  
15  
16  
17  
18  
19  
20  
21  
22  
23  
24  
25  
26  
27  
28  
29  
30  
31  
32  
33  
34  
35  
36  
37  
38  
39  
40  
41  
42  
43  
44  
45  
46  
47  
48  
49  
50  
51  
52  
53  
54  
55  
56  
57  
58  
59  
60

<sup>5</sup> Department of Internal Medicine, Pontificia Universidad Catolica de Chile, Santiago, Chile

<sup>6</sup> Division of Endocrinology, Diabetes, Metabolism and Nutrition, Department of Medicine and Knowledge and Evaluation Research Unit, Mayo Clinic, Rochester, USA

<sup>7</sup> Faculty of Dentistry, University of Chile, Chile.

<sup>8</sup> Institute for Clinical and Economic Review, Boston, MA, USA

<sup>9</sup> Institute of Health and Society, Faculty of Medicine, University of Oslo, Norway

\* **Correspondence to:** Thomas Agoritsas, MD, PhD ([thomas.agoritsas@gmail.com](mailto:thomas.agoritsas@gmail.com))

Division of General Internal Medicine & Division of Clinical Epidemiology

Department Internal Medicine, Rehabilitation and Geriatrics (DMIRG)

University Hospitals of Geneva, Rue Gabrielle-Perret-Gentil 4,

1211 Genève 14, Switzerland

Phone: +41 79 55 34 543

**Keywords:** Clinical Practice Guidelines, Strength of Recommendations, Quality of the Evidence, Clinical Decision Making, Evidence-Based Medicine.

**Abstract:** 295 words / **Manuscript:** 3064 words

**Tables:** 5 / **Supplementary Files:** 2

## ABSTRACT

### Introduction

UpToDate is widely used by clinicians worldwide and includes more than 9,400 recommendations that apply the GRADE framework. GRADE guidance warns against strong recommendations when certainty of the evidence is low or very low (discordant recommendations), but has identified five paradigmatic situations in which discordant recommendations may be justified.

### Objectives

Our objective was to document the strength of recommendations in UpToDate and assess the frequency and appropriateness of discordant recommendations.

### Design

Analytic survey of all recommendations in UpToDate

### Methods

We identified all GRADE recommendations in UpToDate, and examined their strength (strong or weak) and certainty of the evidence (high, moderate, or low certainty). We identified all discordant recommendations as of January 2015, and pairs of reviewers independently classified them either into one of the five appropriate paradigms or into one of three categories inconsistent with GRADE guidance, based on the evidence presented in UpToDate.

### Results

UpToDate included 9451 GRADE recommendations, of which 6501 (68.8%) were

1  
2  
3 formulated as weak recommendations and 2950 (31.2%) as strong. Among the strong,  
4  
5 844 (28.6%) were based on high certainty in effect estimates, 1,740 (59.0%) on  
6  
7 moderate certainty, and 366 (12.4%) on low certainty. Of the 349 discordant  
8  
9 recommendations 204 (58.5%) were judged appropriate (consistent with one of the five  
10  
11 paradigms); we classified 47 (13.5%) as good practice statements; 38 (10.9%)  
12  
13 misclassified the evidence as low certainty when it was at least moderate; and 60  
14  
15 (17.2%) warranted a weak rather than a strong recommendation.  
16  
17

## 18 19 20 **Conclusion**

21  
22  
23 The proportion of discordant recommendations in UpToDate is small (3.7% of all  
24  
25 recommendations), and the proportion that is truly problematic (strong  
26  
27 recommendations that would best have been weak) very small (0.6%). Clinicians should  
28  
29 nevertheless be cautious, and look for clear explanations – in UpToDate and elsewhere –  
30  
31 when guidelines offer strong recommendations based on low certainty evidence.  
32  
33  
34

### 35 **Strengths and limitations of this study**

- 36 - We assessed the strength of recommendations in the largest known sample of  
37  
38 recommendations using GRADE (N=9451) addressing a wide array of clinical fields.
- 39 - We used a taxonomy to appraise discordant recommendations that has been  
40  
41 successfully implemented in two prior assessments of clinical practice guidelines.
- 42 - We based our assessment solely on information published in UpToDate, while  
43  
44 authors of the topics may have considered other factors in deciding to issue a  
45  
46 discordant recommendation.
- 47 - UpToDate topics are narrative in nature and do not include formal summary of  
48  
49 finding tables. As a result, the comparators were often not clearly stated, which may  
50  
51 have influenced the reviewers' inferences about the discordant recommendations.  
52  
53  
54  
55  
56  
57  
58  
59  
60

## INTRODUCTION

To ensure that patients receive optimal care, consistent with their values and preferences, clinicians need trustworthy recommendations based on transparent ratings of certainty of evidence and strength of recommendations.<sup>1</sup> The widely adopted GRADE system (Grading of Recommendations Assessment, Development and Evaluation) offers a systematic and transparent framework to rate certainty (also referred to as quality or confidence) of evidence and to move from evidence to recommendations.<sup>2-5</sup>

Using GRADE, guideline-makers issue strong recommendations when they are confident that the desirable consequences clearly outweigh the undesirable consequences.<sup>6 7</sup> Conversely they should issue weak (also called conditional) when the balance of desirable and undesirable consequences between alternatives is close, the certainty in evidence is low, uncertainty or variability in patients' values and preferences is large, or cost-effectiveness is questionable.<sup>6</sup> Strong recommendations represent "just do it" recommendations applicable to almost all patients; weak recommendations are applicable to the majority of patients and include preference-sensitive decisions that require clinicians to ensure, through shared-decision making, that patients' choices are congruent with their values.<sup>8</sup>

GRADE views strong recommendations in the face of low certainty evidence (we will refer to such situations as *discordant recommendations*) as questionable, and often inappropriate. Some guidelines have a clear surfeit of discordant recommendations. For example, of 456 recommendations in 116 WHO guidelines, 160 (35%) proved discordant.<sup>9 10</sup> Similarly 121 of 357 (34%) recommendations in 17 Endocrine Society Guidelines proved discordant.<sup>11 12</sup>

Though discordant recommendations often represent a violation of GRADE guidance,



1  
2  
3 this is not always the case. GRADE has identified 5 seldom-occurring paradigmatic  
4  
5 situations in which a strong recommendation is warranted despite low certainty in the  
6  
7 evidence (Table 1).<sup>6 13</sup> Further, there is more than one explanation for an apparent  
8  
9 violation of GRADE guidance (a discordant recommendation that fails to meet one of  
10  
11 these criteria). First, the discordant recommendation may actually represent a good  
12  
13 practice statement, in which indirect evidence justifies an inference that the  
14  
15 recommended management option is far superior to the alternative.<sup>14</sup> Indirect evidence  
16  
17 refers to evidence that does not directly address the question at hand, but nevertheless  
18  
19 bears on the question. For instance, though there are no randomized trials of use of a  
20  
21 parachute after jumping out of plane, there is ample indirect evidence suggesting its  
22  
23 impact on mortality from the jump. Second, the panel may have misclassified the  
24  
25 certainty of the evidence (it may actually be moderate or high). Third, and most  
26  
27 concerning, the optimal management option is in fact value and preference-sensitive  
28  
29 and the panel should have issued a weak recommendation (Table 2).<sup>6 13</sup>

30  
31  
32  
33  
34  
35 Of the 160 discordant recommendations in the WHO guideline, 73 (46%) fell into the  
36  
37 most concerning category of those that warranted a weak recommendation.<sup>9 10</sup> Of the  
38  
39 121 discordant recommendations in the Endocrine Society guidelines, 33 (27%)  
40  
41 warranted a weak recommendation.<sup>11</sup> These results demonstrate that excessive use of  
42  
43 strong recommendations in the face of low certainty evidence is common and  
44  
45 concerning.  
46  
47

48  
49  
50 UpToDate ([www.uptodate.com](http://www.uptodate.com))<sup>15</sup> is an electronic medical textbook that uses GRADE  
51  
52 and includes over 9,400 GRADE recommendations<sup>15 16</sup>. UpToDate has instituted  
53  
54 intensive training in GRADE methods for their in-house deputy editors who are largely  
55  
56 responsible for UpToDate material. Training involves regular large and small group  
57  
58  
59  
60

1  
2  
3 seminars, and individual feedback from in-house methodologists.  
4

5  
6 Because it is enormously popular and used by clinicians worldwide, the possibility that  
7  
8 UpToDate is issuing misleading strong recommendations on the basis of low certainty  
9  
10 evidence constitutes a matter of concern. Therefore, we set out to determine, among all  
11  
12 GRADE recommendations in UpToDate, the distribution of strong and weak  
13  
14 recommendations, the proportion of discordant recommendations, and to characterize  
15  
16 discordant recommendations based on the taxonomy described above (Table 1 & 2). In  
17  
18 doing so, we restricted ourselves to the evidence presented in UpToDate, rather than  
19  
20 conducting our own literature review. The reason is that our interest was in evaluating  
21  
22 UpToDate editors' ability to formulate a GRADEd recommendation from the data they  
23  
24 present rather than their ability to find the most relevant data in the literature.  
25  
26  
27  
28  
29  
30  
31  
32  
33  
34  
35  
36  
37  
38  
39  
40  
41  
42  
43  
44  
45  
46  
47  
48  
49  
50  
51  
52  
53  
54  
55  
56  
57  
58  
59  
60

## METHODS

### Design and data source

We conducted an analytic survey of all GRADE recommendations included in UpToDate. We collaborated with UpToDate to identify all 9451 included in UpToDate as of June 2014, and determined their strength (strong or weak), and their certainty in evidence (high, moderate, or low – UpToDate does not use GRADE’s “very low” category). We abstracted the title of each topic, as well as their corresponding clinical domains and age-group populations. From this database, we identified all discordant recommendations included in UpToDate as of January 2015.

### Data abstraction on the discordant recommendations

UpToDate topics summarizing the evidence and rationale supporting the recommendations are mostly in narrative formats, and do not provide summary of finding tables or evidence profiles.<sup>17</sup> To assess the appropriateness of discordant recommendations according to the paradigmatic situation defined in the GRADE framework, we therefore standardized data abstraction to collect relevant information from the main text (detailed instruction [Supplementary File 1](#)).

Eight reviewers working in six pairs – all working actively as clinicians and proficient in GRADE methodology – performed data abstraction and assessed the appropriateness of discordant recommendations in duplicate. They abstracted the following information related to each discordant recommendation:

- Patient population (clinical field and age group);
- Type of intervention (drug, procedure, device, etc.) and type of comparator

- (existing standard care, no intervention, alternative intervention, etc.);
- The clarity of the comparator, classified as (i) clearly and explicitly stated; (ii) not clearly and explicitly stated, but obvious; (iii) not clearly and explicitly stated or obvious, but relatively easy to infer; (iv) not at all clear - uncertain;
  - Outcomes: whether there was an explicit statement on mortality as well as the balance of benefits and harms;
  - Whether there was an explicit statement on the relative importance of outcomes and/or on patients' values and preferences in making the trade-offs between alternative courses of action;
  - Whether issues of cost or resources were explicitly discussed;
  - The evidence supporting the recommendation, both for systematic reviews and primary study designs (randomized trials, observational studies, etc.)
  - Whether the evidence summary suggested large effects in critical outcomes, or that indirect evidence, not incorporated in the grading, seemed to drive the recommendation.

Based on this abstracted information, each reviewer independently classified each of the discordant recommendations as either consistent with one of the five previously identified optimal categories for discordant recommendations (Table 1)<sup>6 10 13</sup> or in one of three categories in which we judged discordant recommendations to be inconsistent with GRADE guidance (Table 2): (i) good practice statements; (ii) a misclassification of the evidence – the evidence warranted moderate or high certainty rather than low; or (iii) uncertainty in the estimates of effect would best lead to a weak recommendation.

We assessed agreement for whether recommendations were appropriate (vs. inappropriate) according to GRADE guidance using the chance-corrected kappa statistic.

1  
2  
3 The reviewers resolved all disagreements by discussion or through referral to an  
4 additional reviewer.  
5  
6  
7

### 8 **Data analysis and reporting** 9

10  
11 We abstracted data in an MS Excel database (v. 14.4) with pre-specified response  
12 categories whenever possible, and exported in SPSS (v. 22.0) for analysis. We analyzed  
13 the recommendation and sample characteristics as natural frequencies and proportions.  
14  
15  
16  
17  
18  
19  
20  
21  
22  
23  
24  
25  
26  
27  
28  
29  
30  
31  
32  
33  
34  
35  
36  
37  
38  
39  
40  
41  
42  
43  
44  
45  
46  
47  
48  
49  
50  
51  
52  
53  
54  
55  
56  
57  
58  
59  
60

## RESULTS

The 2971 topics in UpToDate that included GRADE recommendations covered a broad spectrum of clinical fields and health care, including 16.1% in oncology, 49.2% topics in other internal medicine specialties or primary care, and 12.5% in pediatrics. These topics included 9451 GRADE recommendations, of which 6501 (68.8%) were formulated as weak recommendations and 2950 (31.2%) as strong recommendations (Table 3). The proportion of strong recommendations varied greatly across clinical fields, ranging from 5.8% (in dermatology) to 42.7% (in cardiovascular medicine) (Supplementary File 2).

Of the 2950 strong recommendations, 844 (28.6%) were based on high certainty evidence, 1740 (59.0%) on moderate certainty, and 366 (12.4%) were discordant strong recommendations based on low certainty evidence (Table 3). Because UpToDate is continuously updated, 17 recommendations were modified in strength and/or certainty between the time all 9451 recommendations were retrieved, and the time all topics were downloaded for abstraction, as of January 2015.<sup>15</sup> The final study cohort therefore comprised a total of 349 discordant recommendations.

The 349 discordant recommendations were issued across 274 individual topics in UpToDate (each including a range of one to five recommendations), and the topics addressed covered a broad spectrum of health care issues within each clinical field, (Supplementary File 2). Interventions included drugs (56.4% of recommendations), surgery (19.8%), medical devices (6.9%), diagnostic or screening tests (20.9%), and other behavioral or multi-disciplinary interventions (10.0%). These interventions were most often compared to another intervention or to standard of care (56.7%) and less often to no intervention or placebo (36.1%).

1  
2  
3 The 349 discordant recommendations represent 3.7% of all 9451 recommendations.  
4  
5 The proportion of discordant recommendations varied from 0% (e.g. in palliative care,  
6  
7 dermatology or for recommendations applying specifically to the elderly population), to  
8  
9 7.0% in pediatrics, 8.0% in infectious disease, and 10.9% in hematology (Supplementary  
10  
11 File 2).

### 12 13 14 15 16 **Evidence supporting the discordant recommendations**

17  
18 The comparator was clearly and explicitly stated in 73 (20.9%) of the 349  
19  
20 recommendations, not clearly but either obvious or relatively easy to infer in 230  
21  
22 (65.9%) and uncertain in 46 (13.2%). The direction of the recommendation was most  
23  
24 often framed in favor of the intervention (78.5%) rather than against it (Table 4).

25  
26  
27  
28 The full-text of the UpToDate topic often provided a rationale supporting the  
29  
30 recommendation. An explicit statement on the balance of benefits and harms was  
31  
32 present in 92 (26.4%), and an implicit statement in 157 (45.0%), and no statement in  
33  
34 100 (28.7%). Explicit statements addressing the relative importance of outcomes  
35  
36 and/or on patients' values and preferences in making the trade-offs between  
37  
38 alternatives were present in 10 (2.9%) of the recommendations; they could be inferred  
39  
40 in 171 (49.0%), but not in the remaining 168 (48.1%) of discordant recommendations.  
41  
42 Cost or resources considerations were mentioned in 15 (4.3%). The evidence cited to  
43  
44 support each discordant recommendation varied substantially, with a median of 4  
45  
46 references cited, range from 0 to 33, with 45 (12.9%) of recommendations without any  
47  
48 citation. Observational studies dominated (203, 58.2%); 49 (14.0%) were supported by  
49  
50 a systematic review (Table 4).

### Appropriateness of the discordant recommendations

Kappa for the initial taxonomic judgment regarding whether the recommendation was appropriate or inappropriate according to GRADE guidance was 0.46 (moderate agreement). The two reviewers required consensus discussions for 43% of the discordant recommendations. Third party adjudication to determine the appropriate classification was required in 12 of the discordant recommendations (3.4%).

Reviewers judged 204 (58.5%) of the 349 discordant recommendations to be consistent with one of the five paradigmatic situations in which it is appropriate to offer discordant recommendations (Table 5). The most common paradigm was a “life-threatening or potentially catastrophic situation”, followed by “potential similar benefits, one clearly less risky or costly”, “potential catastrophic harm”, “uncertain benefits, certain harm”, and “established similar benefits, one potentially more risky or costly” (Table 5).

Reviewers judged 47 (13.5%) of the 349 discordant recommendations as “good practice statements”; 38 (10.9%) as a “misclassification of certainty (evidence warranted moderate or high certainty)”; and 60 (17.2%) as warranting a weak recommendation (see Table 5).



## DISCUSSION

Among 9451 GRADE recommendations in UpToDate, about two thirds were formulated as weak recommendations and the remainder as strong recommendations. Of all recommendations, only 3.7% (n=349) were strong recommendations based on low certainty in effect estimates ([Table 3](#)). Of these discordant recommendations, over half were consistent with one of the five paradigmatic situations in which it is appropriate to offer discordant recommendations; approximately 14% represented “good practice statements”; approximately 11% were based on a misclassification of certainty (evidence warranted moderate or high certainty), and approximately 17% were judged to warrant a weak recommendation ([Table 5](#)). The proportion of appropriate discordant recommendations varied across intervention types or clinical fields ([Supplementary File 2](#)). Although most topics in UpToDate provided a rationale to support the discordant recommendation, 29% lacked statements about benefits and harms and 13% did not provide citations, which points at potential areas of improvement for UpToDate related to standards for trustworthy guidelines.<sup>1</sup>

### Strengths and limitations

This study assessed the strength of recommendations in the largest known sample of recommendations developed using GRADE. Indeed, even large guidelines include a few hundred recommendations<sup>18</sup>, whereas UpToDate topics have one of the largest known coverage in clinical fields and included 9451 recommendations at the time of this assessment.

The taxonomy that we used has been successfully implemented in two prior studies of clinical guidelines<sup>10 11</sup> (see below: relation to prior work). Our reviewers could all be

1  
2  
3 characterized as expert GRADE methodologists: they were clinical epidemiologists with  
4  
5 an in-depth understanding of GRADE methodology acquired through use of GRADE in a  
6  
7 large number of assessments over a period of years and were therefore well equipped to  
8  
9 assess judgments on evidence and recommendations. This differs markedly from  
10  
11 UpToDate authors (some with little understanding of GRADE) and UpToDate editors (all  
12  
13 of whom have received basic GRADE training, but some little more than that). Despite  
14  
15 the advanced skills of our reviewers, chance corrected kappa agreement on the  
16  
17 appropriateness of recommendations was moderate (0.48).<sup>19</sup> Consensus discussions  
18  
19 were needed for 43% of discordant recommendations, although formal adjudication by  
20  
21 third parties was required for only 12 discordant recommendations (3.4%).  
22  
23  
24

25  
26 The necessity for frequent consensus discussions reflects the substantial judgment  
27  
28 required in categorizing recommendations. This is in part due to the narrative nature of  
29  
30 UpToDate topics, which does not include formal summary of finding tables or evidence  
31  
32 profiles<sup>17</sup>, often discussing the evidence and rationale for several recommendations in a  
33  
34 free-text cross-referenced structure that sometimes omits statements regarding benefits  
35  
36 and harms, and lacks citations. The one previous study using this taxonomy that  
37  
38 addressed chance-corrected agreement reported a kappa of 0.68. The higher kappa may  
39  
40 well be a result of more explicit reporting with use of summary of findings tables in the  
41  
42 WHO guidelines that were the subject of investigation. The concern regarding the need  
43  
44 for consensus discussions is perhaps increased because a single team using a single  
45  
46 system of categorization undertook the study. A further limitation of our study is that  
47  
48 decisions were based solely on information published in UpToDate, while authors of the  
49  
50 topics may have considered other factors.<sup>20</sup>  
51  
52  
53  
54

55  
56 Another element contributing to the challenges in making categorizations is the clarity  
57  
58 of the comparison on which the recommendation applies. As in previous assessment in  
59  
60

1  
2  
3 guidelines<sup>9</sup>, the comparator was clearly and explicitly stated in only 73 (20.9%) of  
4  
5 discordant recommendations and was uncertain in 46 (13.2%). When comparators  
6  
7 were not clear and explicit, reviewers' inferences may not always have been correct.<sup>20</sup>  
8  
9

### 10 11 **Relation to previous work**

12  
13  
14 Two prior studies provided a formal structured exploration of discordant  
15  
16 recommendations using the GRADE approach. An assessment of 357 recommendations  
17  
18 in 17 Endocrine Society Guidelines found that only 29% of discordant recommendations  
19  
20 were consistent with one of the 5 paradigmatic situations.<sup>11</sup> A second study of 456  
21  
22 recommendations in 116 WHO guidelines using GRADE found that of 160 discordant  
23  
24 recommendations, only 15.6% were judged consistent with GRADE guidance.<sup>9 10</sup>  
25  
26  
27

28  
29 Our results contrast with these previous two studies. First, the proportion of weak  
30  
31 recommendations was approximately 30% higher in UpToDate than in WHO and  
32  
33 Endocrine Society guidelines. This proportion was, however, similar to the 9<sup>th</sup> edition  
34  
35 ACCP guideline on Antithrombotic Therapy and Prevention of Thrombosis, after it  
36  
37 implemented GRADE.<sup>18 21</sup> Second, the proportion of inappropriate, discordant  
38  
39 recommendation was considerably lower. Of the discordant recommendations, the  
40  
41 proportion that should have been weak was about 17%, rather than 27% (Endocrine  
42  
43 Society)<sup>11</sup> or 46% (WHO guidelines).<sup>9</sup>  
44  
45  
46

47  
48 A subsequent interview of panel members involved in the WHO guidelines highlighted  
49  
50 reasons contributing to discordant recommendations. These included political  
51  
52 considerations around long-established practices, the need for funding and policy  
53  
54 formulation, or the fear of pushback from media.<sup>20</sup> Panel members also expressed  
55  
56 skepticism regarding the value of making weak recommendations, or concerns they may  
57  
58  
59  
60

1  
2  
3 be ignored<sup>20</sup>, although another study reported that WHO weak recommendations are  
4 frequently adopted in national policies (uptake of 61% for weak recommendations  
5 versus 82% for strong recommendations).<sup>22</sup> Finally, the authors identified both financial  
6 and intellectual conflicts of interest among panel members as an explanation for  
7 discordant recommendations.<sup>20 23</sup> Any or all of these factors may have contributed to  
8 UpToDate discordant recommendations.  
9  
10  
11  
12  
13  
14  
15  
16  
17  
18

## 19 **Implications and conclusion**

20  
21 For users of UpToDate, our results are generally, though not absolutely, reassuring. The  
22 proportion of discordant recommendations is very small – only 3.7% of all  
23 recommendations. Furthermore, of the three categories inconsistent with GRADE  
24 guidance – good practice statement, misclassification of the certainty, and evidence  
25 warranting a weak recommendation (Table 2) – the third is by far the most  
26 problematic.<sup>9</sup> Good practice statements are appropriate when indirect evidence that is  
27 difficult to collect and summarize warrants high certainty in the impact of a given  
28 intervention and when the balance benefits and harms is large.<sup>14</sup> Thus, in terms of  
29 implications for clinical practice, good practice statements have the same force as strong  
30 recommendations. Similarly with misclassification of certainty: since the certainty is  
31 actually moderate or high, a strong recommendation is appropriate. Recommendations  
32 that should have been weak instead of strong provide inappropriate “just do it” guidance  
33 for clinical practice, although they are actually preference-sensitive and should thus  
34 warrant shared-decision making.<sup>8</sup> Of the 349 discordant recommendations in UpToDate,  
35 only 60 fall in the category of inappropriate strong recommendations.  
36  
37  
38  
39  
40  
41  
42  
43  
44  
45  
46  
47  
48  
49  
50  
51  
52  
53  
54

55 Thus, clinicians using UpToDate can anticipate that they will be misleadingly instructed  
56  
57  
58  
59  
60

1  
2  
3 to take a “just do it” rather than an “it depends” approach to clinical decision making in  
4  
5 0.6% (6 of 1,000) UpToDate recommendations.<sup>15</sup> This seems close to a threshold in  
6  
7 which one might ignore the problem. Nevertheless, we would still encourage clinicians  
8  
9 to be alert to the possibility of an inappropriate strong recommendation – in UpToDate  
10  
11 or elsewhere – whenever the recommendation is based on low certainty evidence and  
12  
13 authors fail to provide an explicit rationale corresponding to one of the categories in  
14  
15 Table 1.  
16  
17

18  
19 A likely explanation for UpToDate’s success in avoiding inappropriate discordant  
20  
21 recommendations is the training and feedback that their deputy editors receive. For  
22  
23 organizations using GRADE, our results suggest the desirability of such training for  
24  
25 those involved in formulating recommendations to optimize use of GRADE.  
26  
27

28  
29 Finally our results highlight the need for authors of trustworthy recommendations or  
30  
31 guidelines<sup>1</sup> to provide clear and explicit comparators, as well as transparent and  
32  
33 systematic reports of the key ingredients of their rationale when moving from evidence  
34  
35 to recommendation.<sup>17 24 25</sup> Future avenues for research should also look at optimal  
36  
37 presentation formats of EBM textbooks and guidelines, to ensure clinicians actually  
38  
39 understand both the rationale and potential implications of all recommendations for  
40  
41 clinical practice.<sup>8 26-29</sup>  
42  
43  
44  
45  
46  
47  
48  
49  
50  
51  
52  
53  
54  
55  
56  
57  
58  
59  
60

## LIST OF ABBREVIATIONS

GRADE: Grading of Recommendations Assessment, Development and Evaluation

WHO: World Health Organization

ACCP: American College of Chest Physicians

## COMPETING INTERESTS

TA, AK, IN, RBP, PEA, DR, POV, and GHG are active members of the GRADE working group.

DR, at the time the data on graded recommendations was extracted from UpToDate and until 2016, was an employee of UpToDate – he reports personal fees from UpToDate, outside the submitted work.

GHG contributes to the training in GRADE methods for UpToDate in-house deputy editors, for which he reports personal fees from UpToDate, outside the submitted work.

## CONTRIBUTORS

Thomas Agoritsas (TA) and Gordon H. Guyatt (GHG) designed the study. David Rind (DR) provided the list of all recommendations and grading from UpToDate. Paul E. Alexander (PEA) helped structuring data abstraction. Thomas Agoritsas (TA), Arnaud Merglen (AM), Anja F. Heen (AFH), Annette Kristiansen (AK), Ignacio Neumann (IN), Juan P. Brito (JPB), Romina Brignardello-Petersen (RBP), and Per O. Vandvik (POV) reviewed the recommendations in duplicate and classified them according to GRADE taxonomy. Thomas Agoritsas (TA) and Gordon Guyatt (GG) wrote the first draft of the manuscript. All authors have read the manuscripts and made improvements of the content and wording.

## FUNDING / ACKNOWLEDGMENTS

This research received no specific grant from any funding agency in the public, commercial or not-for-profit sectors.

## DATA SHARING STATEMENT

There were no additional unpublished data from this study.

## REFERENCES

1. Institute of Medicine (US) Committee on Standards for Developing Trustworthy Clinical Practice Guidelines. . In: Graham R, Mancher M, Miller Wolman D, et al., eds. Clinical Practice Guidelines We Can Trust. Washington (DC), 2011.
2. Guyatt GH, Oxman AD, Vist GE, et al. GRADE: an emerging consensus on rating quality of evidence and strength of recommendations. *BMJ* 2008;**336**(7650):924-6.
3. Guyatt G, Oxman AD, Akl EA, et al. GRADE guidelines: 1. Introduction-GRADE evidence profiles and summary of findings tables. *J Clin Epidemiol* 2011;**64**(4):383-94.
4. Alonso-Coello P, Schunemann HJ, Moher J, et al. GRADE Evidence to Decision (EtD) frameworks: a systematic and transparent approach to making well informed healthcare choices. 1: Introduction. *BMJ* 2016;**353**:i2016.
5. Alonso-Coello P, Oxman AD, Moher J, et al. GRADE Evidence to Decision (EtD) frameworks: a systematic and transparent approach to making well informed healthcare choices. 2: Clinical practice guidelines. *BMJ* 2016;**353**:i2089.
6. Andrews J, Guyatt G, Oxman AD, et al. GRADE guidelines: 15. Going from evidence to recommendations: the significance and presentation of recommendations. *J Clin Epidemiol* 2013.
7. Balshem H, Helfand M, Schunemann HJ, et al. GRADE guidelines: 3. Rating the quality of evidence. *J Clin Epidemiol* 2011;**64**(4):401-6.
8. Agoritsas T, Heen AF, Brandt L, et al. Decision aids that really promote shared decision making: the pace quickens. *BMJ* 2015;**350**:g7624.
9. Alexander PE, Brito JP, Neumann I, et al. World Health Organization strong recommendations based on low-quality evidence (study quality) are frequent and often inconsistent with GRADE guidance. *J Clin Epidemiol* 2016;**72**:98-106.
10. Alexander PE, Bero L, Montori VM, et al. World Health Organization recommendations are often strong based on low confidence in effect estimates. *J Clin Epidemiol* 2014;**67**(6):629-34.
11. Brito JP, Domecq JP, Murad MH, et al. The Endocrine Society guidelines: when the confidence cart goes before the evidence horse. *The Journal of clinical endocrinology and metabolism* 2013;**98**(8):3246-52.
12. Vigersky RA, Bhasin S, Martin KA. The Endocrine Society Clinical Practice Guidelines: a self-assessment. *The Journal of clinical endocrinology and metabolism* 2013;**98**(8):3174-7.
13. Neumann I, Santesso N, Akl EA, et al. A guide for health professionals to interpret and use recommendations in guidelines developed with the GRADE approach. *J Clin Epidemiol* 2016;**72**:45-55.

14. Guyatt GH, Schunemann HJ, Djulbegovic B, et al. Guideline panels should not GRADE good practice statements. *J Clin Epidemiol* 2014.
15. UpToDate, Waltham, MA. <http://www.uptodate.com> (Accessed on July 7th, 2017).
16. Agoritsas T, Vandvik PO, Neumann I, Rochwerg B, Jaeschke R, Hayward R, Guyatt GH, McKibbin A. Chapter 5. Finding Current Best Evidence, in *JAMA Users' Guides to the Medical Literature: A Manual for Evidence-Based Clinical Practice*, 3rd Edition, McGraw-Hill Medical, 2015.
17. Guyatt G, Oxman AD, Akl E, et al. GRADE guidelines 1. Introduction-GRADE evidence profiles and summary of findings tables. *J Clin Epidemiol* 2010.
18. Agoritsas T, Neumann I, Mendoza C, et al. Guideline conflict of interest management and methodology heavily impacts on the strength of recommendations: comparison between two iterations of the American College of Chest Physicians Antithrombotic Guidelines. *J Clin Epidemiol* 2017;**81**:141-43.
19. Landis JR, Koch GG. The measurement of observer agreement for categorical data. *Biometrics* 1977;**33**(1):159-74.
20. Alexander PE, Gionfriddo MR, Li SA, et al. A number of factors explain why WHO guideline developers make strong recommendations inconsistent with GRADE guidance. *J Clin Epidemiol* 2016;**70**:111-22.
21. Guyatt GH, Norris SL, Schulman S, et al. Methodology for the development of antithrombotic therapy and prevention of thrombosis guidelines: Antithrombotic Therapy and Prevention of Thrombosis, 9th ed: American College of Chest Physicians Evidence-Based Clinical Practice Guidelines. *Chest* 2012;**141**(2 Suppl):53S-70S.
22. Nasser SM, Cooke G, Kranzer K, et al. Strength of recommendations in WHO guidelines using GRADE was associated with uptake in national policy. *J Clin Epidemiol* 2015;**68**(6):703-7.
23. Alexander PE, Li SA, Gionfriddo MR, et al. Senior GRADE methodologists encounter challenges as part of WHO guideline development panels: an inductive content analysis. *J Clin Epidemiol* 2016;**70**:123-8.
24. Guyatt GH, Oxman AD, Kunz R, et al. GRADE guidelines: 2. Framing the question and deciding on important outcomes. *J Clin Epidemiol* 2011;**64**(4):395-400.
25. Guyatt GH, Oxman AD, Kunz R, et al. Going from evidence to recommendations. *BMJ* 2008;**336**(7652):1049-51.
26. Vandvik PO, Brandt L, Alonso-Coello P, et al. Creating clinical practice guidelines we can trust, use, and share: a new era is imminent. *Chest* 2013;**144**(2):381-9.
27. Kristiansen A, Brandt L, Alonso-Coello P, et al. Development of a novel multilayered



1  
2  
3 presentation format for clinical practice guidelines. Chest 2014.

4  
5 28. Treweek S, Oxman AD, Alderson P, et al. Developing and evaluating communication strategies  
6 to support informed decisions and practice based on evidence (DECIDE): protocol and  
7 preliminary results. Implement Sci 2013;**8**:6.

8  
9  
10 29. Siemieniuk RA, Agoritsas T, Macdonald H, et al. Introduction to BMJ Rapid Recommendations.  
11 BMJ 2016;**354**:i5191.  
12  
13  
14  
15  
16  
17  
18  
19  
20  
21  
22  
23  
24  
25  
26  
27  
28  
29  
30  
31  
32  
33  
34  
35  
36  
37  
38  
39  
40  
41  
42  
43  
44  
45  
46  
47  
48  
49  
50  
51  
52  
53  
54  
55  
56  
57  
58  
59  
60

1  
2  
3  
4  
5  
6  
7  
8  
9  
10  
11  
12  
13  
14  
15  
16  
17  
18  
19  
20  
21  
22  
23  
24  
25  
26  
27  
28  
29  
30  
31  
32  
33  
34  
35  
36  
37  
38  
39  
40  
41  
42  
43  
44  
45  
46  
47  
48  
49

**Table 1. Paradigmatic situations in which a strong recommendation may be warranted despite low or very low certainty in effect estimates (appropriate strength, consistent with GRADE)**

| Situation                                                                                 | Certainty in Estimates (Quality of Evidence) |                               | Balance of Benefits and Harms                                                                                                                                                 | Values and Preferences                                                                                                | Resource Considerations                                                                                  | Recommendation                                                            | Example                                                                                                                                                                                                                                                                                                                                                                                                                                                                                               |
|-------------------------------------------------------------------------------------------|----------------------------------------------|-------------------------------|-------------------------------------------------------------------------------------------------------------------------------------------------------------------------------|-----------------------------------------------------------------------------------------------------------------------|----------------------------------------------------------------------------------------------------------|---------------------------------------------------------------------------|-------------------------------------------------------------------------------------------------------------------------------------------------------------------------------------------------------------------------------------------------------------------------------------------------------------------------------------------------------------------------------------------------------------------------------------------------------------------------------------------------------|
|                                                                                           | Benefits                                     | Harms                         |                                                                                                                                                                               |                                                                                                                       |                                                                                                          |                                                                           |                                                                                                                                                                                                                                                                                                                                                                                                                                                                                                       |
| <b>1. Life-threatening (or catastrophic) situation</b>                                    | Low or very low                              | Immaterial (very low to high) | Intervention may reduce mortality in a life-threatening situation; adverse events not prohibitive                                                                             | A very high value is placed on an uncertain but potentially life-preserving benefit                                   | Small incremental cost (or resource use) relative to the benefits justify the intervention               | Strong recommendation in favor of the intervention                        | Indirect evidence from seasonal influenza suggests that patients with avian influenza may benefit from the use of oseltamivir (low certainty in effect estimates). Given the high mortality of the disease and the absence of effective alternatives, the WHO made a strong recommendation in favor of the use of oseltamivir rather than no treatment in patients with avian influenza.                                                                                                              |
| <b>2. Uncertain benefit, certain harm</b>                                                 | Low or very low                              | High or moderate              | Possible but uncertain benefit; substantial established harm                                                                                                                  | A much higher value is placed on the adverse events in which we are confident than in the benefit, which is uncertain | High incremental cost (or resource use) relative to the benefits may not justify the intervention        | Strong recommendation against the intervention                            | In patients with idiopathic pulmonary fibrosis, treatment with azathioprine plus prednisone offers a possible but uncertain benefit in comparison with no treatment. The intervention, however, is associated with a substantial established harm. An international guideline made a recommendation against the combination of corticosteroids plus azathioprine in patients with idiopathic pulmonary fibrosis.                                                                                      |
| <b>3. Potential equivalence, one option clearly less risky or costly</b>                  | Low or very low                              | High or moderate              | Magnitude of benefit apparently similar—though uncertain—for alternatives; we are confident less harm or cost for one of the competing alternatives                           | A high value is placed on the reduction in harm                                                                       | High incremental cost (or resource use) relative to the benefits may not justify one of the alternatives | Strong recommendation for less harmful/less expensive                     | Low-quality evidence suggests that initial <i>Helicobacter pylori</i> eradication in patients with early stage extranodal marginal zone (MALT) B-cell lymphoma results in similar rates of complete response in comparison with the alternatives of radiation therapy or gastrectomy, but with high certainty of less harm, morbidity, and cost. Consequently, UpToDate made a strong recommendation in favor of <i>H pylori</i> eradication rather than radiotherapy in patients with MALT lymphoma. |
| <b>4. High certainty in similar benefits, one option potentially more risky or costly</b> | High or moderate                             | Low or very low               | Established that magnitude of benefit is similar for alternative management strategies; best (though uncertain) estimate is that one alternative has appreciably greater harm | A high value is placed on avoiding the potential increase in harm                                                     | High incremental cost (or resource use) relative to the benefits may not justify one of the alternatives | Strong recommendation against the intervention with possible greater harm | In women requiring anticoagulation and planning conception or in pregnancy, high certainty estimates suggest similar effects of different anticoagulants. However, indirect evidence (low certainty in effect estimates) suggests potential harm to the unborn infant with oral direct thrombin (eg, dabigatran) and factor Xa inhibitors (eg, rivaroxaban, apixaban). The AT9 guidelines recommended against the use of such anticoagulants in women planning conception or in pregnancy.            |
| <b>5. Potential catastrophic harm</b>                                                     | Immaterial (very low to high)                | Low or very low               | Potential important harm of the intervention, magnitude of benefit is variable                                                                                                | A high value is placed on avoiding potential increase in harm                                                         | High incremental cost (or resource use) relative to the benefits, may not justify the intervention       | Strong recommendation against the intervention                            | In males with androgen deficiency, testosterone supplementation likely improves quality of life. Low- certainty evidence suggests that testosterone increases cancer spread in patients with prostate cancer. The US Endocrine Society made a recommendation against testosterone supplementation in patients with prostate cancer.                                                                                                                                                                   |

Reproduced and adapted from Neumann & al.<sup>13</sup>

**Table 2. Reasons for issuing strong recommendation based on low certainty in effect estimates inconsistent with GRADE guidance**

| Situation                                                                                                                  | Example                                                                                                                                                                                                                                                                                                            |
|----------------------------------------------------------------------------------------------------------------------------|--------------------------------------------------------------------------------------------------------------------------------------------------------------------------------------------------------------------------------------------------------------------------------------------------------------------|
| <b>Best practice recommendation</b><br>(for which sensible alternatives do not exist)                                      | "For patients with congenital adrenal hyperplasia, we recommend monitoring patients for signs of glucocorticoid excess, as well as for signs of inadequate androgen suppression." This statement should not have been GRADEed as sensible alternatives do not exist                                                |
| <b>The strong recommendation was warranted because the certainty of the evidence was actually moderate rather than low</b> | "We recommend intensive lifestyle modification to the entire family and to the patient, and as the prerequisite for all overweight and obesity treatments for children and adolescents." The authors classified this as low quality evidence; our judgment is that the correct classification is moderate quality. |
| <b>Lack of compelling explanation</b><br>(the recommendation should have been weak)                                        | "If a patient is unable or unwilling to undergo surgery, we recommend medical treatment with mineralocorticoids" Lack of evidence of mineralocorticoids being superior to other medical treatment (eg, anti-hypertensive medications)                                                                              |

Elements adapted from Brito et al.<sup>11</sup>

**Table 3. Distribution of the strength of the recommendations in UpToDate according to the certainty in evidence**

|                           | <b>Weak<br/>Recommendations</b> | <b>Strong<br/>Recommendations</b> | <b>All<br/>Recommendations</b> |
|---------------------------|---------------------------------|-----------------------------------|--------------------------------|
|                           | <b>N (%)</b>                    | <b>N (%)</b>                      | <b>N (%)</b>                   |
| <b>Low certainty</b>      | 4335 (66.7%)                    | 366 (12.4%)                       | 4701 (49.7%)                   |
| <b>Moderate certainty</b> | 2019 (31.1%)                    | 1740 (59.0%)                      | 3759 (39.8%)                   |
| <b>High certainty</b>     | 147 (2.3%)                      | 844 (28.6%)                       | 991 (10.5%)                    |
| <b>Total</b>              | <b>6501</b>                     | <b>2950</b>                       | <b>9451</b>                    |
|                           | <b>(68.8% of all rec)</b>       | <b>(31.2% of all rec)</b>         | <b>(100%)</b>                  |

**Table 4. Characteristics of all 349 discordant recommendations in UpToDate, and proportion of appropriate discordant recommendations**

|                                                                                       | N (%)      | % of appropriate discordant<br>( <i>p</i> -value) |
|---------------------------------------------------------------------------------------|------------|---------------------------------------------------|
| <b>Clinical Specialties</b>                                                           |            | ( <i>p</i> = 0.160) *                             |
| Primary Care and General Internal Medicine                                            | 15 (4.3)   | 53.3                                              |
| Emergency Medicine                                                                    | 16 (4.6)   | 81.3                                              |
| Critical Care                                                                         | 5 (1.4)    | 80.0                                              |
| Internal Medicine specialties                                                         | 158 (45.3) | 57.6                                              |
| Oncology (including hemato-oncology)                                                  | 43 (12.3)  | 55.8                                              |
| Pediatrics                                                                            | 73 (20.9)  | 47.9                                              |
| Obstetrics, Gynecology and Women Health                                               | 19 (5.4)   | 73.7                                              |
| General Surgery                                                                       | 13 (3.7)   | 69.2                                              |
| Anesthesiology                                                                        | 3 (0.9)    | 100.0                                             |
| Psychiatry                                                                            | 4 (1.1)    | 75.0                                              |
| <b>Intervention type</b>                                                              |            | ( <i>p</i> = 0.010)                               |
| Drug intervention                                                                     | 197 (56.4) | 61.4                                              |
| Surgical interventions                                                                | 69 (19.8)  | 59.4                                              |
| Medical device                                                                        | 24 (6.9)   | 62.5                                              |
| Behavioural or multi-disciplinary intervention                                        | 35 (10.0)  | 57.1                                              |
| Diagnostic test, screening programmes                                                 | 24 (6.9)   | 29.2                                              |
| <b>Clarity of the comparator</b>                                                      |            | ( <i>p</i> < 0.001)                               |
| Comparator not at all clear – uncertain                                               | 46 (13.2)  | 37.0                                              |
| Comparator not clearly and explicitly stated or obvious, but relatively easy to infer | 120 (34.4) | 48.3                                              |
| Comparator not clearly and explicitly stated, but obvious                             | 110 (31.5) | 68.2                                              |
| Comparator clearly and explicitly stated                                              | 73 (20.9)  | 74.0                                              |
| <b>Type of comparator</b>                                                             |            | ( <i>p</i> = 0.083)                               |
| Too unclear                                                                           | 25 (7.2)   | 44.0                                              |
| No intervention (or placebo)                                                          | 126 (36.1) | 54.0                                              |
| Other intervention(s) (standard of care or alternative(s))                            | 198 (56.7) | 63.1                                              |
| <b>Direction of the recommendation</b>                                                |            | ( <i>p</i> < 0.001)                               |
| For the intervention (i.e. against the comparator)                                    | 274 (78.5) | 51.1                                              |
| Against the intervention (i.e. for the comparator)                                    | 75 (21.5)  | 85.3                                              |
| <b>Mortality</b>                                                                      |            | ( <i>p</i> < 0.001)                               |
| No statement about mortality                                                          | 189 (54.2) | 47.1                                              |
| Implicit statement about mortality                                                    | 47 (13.5)  | 68.1                                              |
| Explicit statement about mortality                                                    | 113 (32.4) | 73.5                                              |
| <b>Balance of benefits and harms</b>                                                  |            | ( <i>p</i> < 0.001)                               |
| No statement about the balance of outcomes                                            | 100 (28.7) | 28.0                                              |
| Implicit statement about the balance of outcomes                                      | 157 (45.0) | 66.9                                              |
| Explicit statement about the balance of outcomes                                      | 92 (26.4)  | 77.2                                              |

|    |                                                                   |                  |                     |
|----|-------------------------------------------------------------------|------------------|---------------------|
| 1  |                                                                   |                  |                     |
| 2  |                                                                   |                  |                     |
| 3  |                                                                   |                  |                     |
| 4  | <b>Relative Importance of outcomes - Values &amp; Preferences</b> |                  | ( <i>p</i> < 0.001) |
| 5  | No statement about the relative importance of outcomes            | 168 (48.1)       | 42.9                |
| 6  | Implicit statement about the relative importance of outcomes      | 171 (49.0)       | 73.1                |
| 7  | Explicit statement about the relative importance of outcomes      | 10 (2.9)         | 70.0                |
| 8  |                                                                   |                  |                     |
| 9  | <b>Cost of resources</b>                                          |                  | ( <i>p</i> = 0.023) |
| 10 | No statement about cost or resources                              | 334 (95.7)       | 57.2                |
| 11 | Cost or resources clearly and explicitly stated                   | 15 (4.3)         | 86.7                |
| 12 |                                                                   |                  |                     |
| 13 | <b>Supporting systematic review (SR)</b>                          |                  | ( <i>p</i> = 0.175) |
| 14 | No SR is cited                                                    | 300 (86.0)       | 56.3                |
| 15 | SR of Observational studies                                       | 22 (6.3)         | 63.6                |
| 16 | SR of both RCT and Observational studies                          | 13 (3.7)         | 76.9                |
| 17 | SR of Randomized Trials (RCT)                                     | 14 (4.0)         | 78.6                |
| 18 |                                                                   |                  |                     |
| 19 | <b>Design of primary studies</b>                                  |                  | ( <i>p</i> = 0.002) |
| 20 | No reference cited                                                | 45 (12.9)        | 35.6                |
| 21 | Other type (eg narrative review, book chapter)                    | 48 (13.8)        | 54.2                |
| 22 | Observational studies                                             | 203 (58.2)       | 61.1                |
| 23 | Randomized Trials (RCT)                                           | 53 (15.2)        | 71.7                |
| 24 |                                                                   |                  |                     |
| 25 | <b>Total</b>                                                      | <b>349 (100)</b> | <b>58.5</b>         |
| 26 |                                                                   |                  |                     |

\* The null hypothesis for the p-value is that the proportions do not differ across categories.

**Table 5. Summary judgments on the appropriateness of 349 discordant strong recommendation based on low certainty in effect in UpToDate**

|                                                                           | N (%)             |
|---------------------------------------------------------------------------|-------------------|
| <b>Appropriate discordant recommendations (consistent with GRADE)</b>     |                   |
| 1. Life-threatening (or catastrophic) situation                           | 70 (20.1)         |
| 2. Uncertain Benefit, Certain Harm                                        | 28 (8.0)          |
| 3. Potential similar benefits, One clearly less risky (or costly)         | 56 (16.0)         |
| 4. Established similar benefits, One potentially more risky (or costly)   | 18 (5.2)          |
| 5. Potential catastrophic harm                                            | 32 (9.2)          |
| Total                                                                     | <b>204 (58.5)</b> |
| <b>Inappropriate discordant recommendations (inconsistent with GRADE)</b> |                   |
| 6. Good Practice Statement                                                | 47 (13.5)         |
| 7. Misclassification of certainty (judged moderate or high)               | 38 (10.9)         |
| 8. Lack of explanation, should have been weak recommendation (GRADE 2C)   | 60 (17.2)         |
| Total                                                                     | <b>145 (41.5)</b> |

## Supplementary File 1. INSTRUCTION FOR ABSTRACTION

*Please read carefully before starting abstraction.*

*For any questions please contact me ASAP ([thomas.agoritsas@gmail.com](mailto:thomas.agoritsas@gmail.com))*

### Background

- In a first phase of the project, we characterized the strength and confidence of the 9451 GRADE recommendations in UTD.
- In this last phase, we are focusing on
  - The **349 strong recommendations based on low confidence (GRADE 1C)**
  - Which are included in a total of **274 topics** (=chapters in UpToDate).
- The main objective is to categorize them based according the following taxonomy
  - Appropriate grading: recommendation consistent with one of the five paradigmatic situations defined the GRADE framework ([see examples in Table 1 below](#)):
    - [App#1] *Life-threatening situation*
    - [App#2] *Uncertain Benefit, Certain Harm*
    - [App#3] *Potential similar benefits, one clearly less risky (or costly)*
    - [App#4] *Established similar benefits, one potentially more risky (or costly)*
    - [App#5] *Potential catastrophic harm of one option*
  - Inappropriate grading: recommendation inconsistent with GRADE ([see examples in Table 2 below](#)), in short:
    - [Inapp#1] *Good Practice Statement*
    - [Inapp#2] *Misclassification of confidence (should have been GRADE 1B or 1A)*
    - [Inapp#3] *Lack of explanation, should have been a weak rec (GRADE 2C)*

→ Before starting, please read the examples and [Appendix Tables 1 & 2](#), they are also embedded in separate tabs in the abstraction excel file. Do not focus on memorizing them, as data abstraction will guide you in your judgment.

### Abstraction Excel File & Variables

- We will conduct the whole abstraction process in the attached standardized excel file
- We have kept the variables to abstract to the minimum necessary, most with **pre-defined response categories in drop-down menus** (and infrequently as free-text for copy-pasting).
- **Each recommendation has a separate row in the file.** There are sometimes more than GRADE 1C per UTD topic (the number are indicated).
- **As a guiding principle, keep in mind that the main objective is to assess the most appropriate taxonomy (first as appropriate or inappropriate, then subcategory).**  
**These are the last variables in the file.**
- This requires judgment based on what is reported in the UpToDate topic, mostly in narrative form. Indeed, there are typically no “summary of findings tables” of “evidence profiles” to explicit GRADE assessment. Absolute certainty in taxonomy is sometimes hard to achieve, but try and assign the best fit you can.
- The abstraction form is organized as follows to guide your final judgment:



|                                 |                                                                                                                                                                              |
|---------------------------------|------------------------------------------------------------------------------------------------------------------------------------------------------------------------------|
| UpToDate TOPIC & RECOMMENDATION | Pre-entered data to help you identify the relevant topic in the UpToDate topic in the dropbox                                                                                |
| POPULATION                      | Check pre-entered clinical field, document age-group                                                                                                                         |
| INTERVENTION                    | Intervention type                                                                                                                                                            |
| COMPARATOR                      | Clarity and type of the comparator, direction of rec                                                                                                                         |
| OUTCOME – Benefits & Harms      | Statement about: mortality, balance of benefits & harms, their relative importance (ie. values/preferences), cost                                                            |
| EVIDENCE supporting the rec     | Date of literature review & updates<br>number and type of supporting evidence<br>Indication regarding the potential role of indirect evidence,<br>Presence of large effects. |
| Conflict of interest (COI)      | Copy paste statement, presence of financial COI                                                                                                                              |
| TAXONOMY – APPROPRIATE          | <b>Separate judgement on each of the 5 paradigmatic situation defined by GRADE</b><br>(clear, possible, no)                                                                  |
| TAXONOMY – INAPPROPRIATE        | <b>Separate judgment on each of the 3 inappropriate situations</b>                                                                                                           |
| CONFLICT RESOLUTION             | <b>TAXONOMY DECISION</b> (for kappa),<br>confidence in the decision (to document),<br>assessing agreement and <b>RECONCILED TAXONOMY</b> within each pair of abstractor.     |
| ADJUDICATION                    | Recording adjudication third reviewer if this was necessary                                                                                                                  |

- **Specific guidance for each variable is found in the GREY BOXES on top of each column.**
- **Please read and select best option from DROP-DOWN menus within each cell**
- A few cells are for free-text to copy paste from the topic. Be sure to double click in the cell before pasting content, to keep the format intact.
- Most variables are followed by a column labelled “**additional comments**” or “rationale”. These are for your personal notes to guide conflict resolution.
- A few examples already abstracted are shown in the first rows as an indication.

### **Abstraction: STEP-BY-STEP**

**Start abstracting a few first recommendations to get familiar with the process and contact me ([thomas.agoritsas@gmail.com](mailto:thomas.agoritsas@gmail.com)) for any question. I'm happy to have a quick skype if and as often as necessary.**

- Go to the recommendation in the next row in the excel file.
- The [topic\_#] and [topic\_title] correspond to the name of the **PDF file** for the corresponding UTD topic → Open it.
- **Search automatically (ctrl-R or command-F) for “1C” → This will directly lead you to the GRADE 1C recommendation(s) at the end of the topic under the “Summary and Recommendations” section.**
- Read it carefully, and take a few seconds to try and get some first rough impression re: potential taxonomy
- **Then, find the corresponding paragraph in the topic that supports the recommendation** (it is often indicated soon after the recommendation (e.g. “See treatment...”). If not, try and find which paragraph(s) discuss(es) the recommendation.
- Abstract all variables in the order of the file as this will guide your formal judgment.
- Then judge each of the 5 appropriate and 3 inappropriate categories in the taxonomy.
- Then decide which one fits best and document the confidence you have in your assessment.
- Go to the next recommendation in the next row. (if this is in the same topic, you'll be able to copy several or your answers.

## ***Conflict resolution and adjudication***

- **You've been assigned with a paired reviewer. Schedule a first conflict resolution in the following days to ensure you are on the same page.**
- Record the agreed taxonomy in the specific column ("RECONCILED TAXONOMY"). Do NOT modify your initial judgement ("TAXONOMY DECISION") - as this will use to calculate kappa.
- **If you cannot resolve conflict, send us your questions for adjudication by a third reviewer.**
- Record adjudication in the final column.

➤ **Thanks again for your help. Do not hesitate to contact me for any questions ([thomas.agoritsas@gmail.com](mailto:thomas.agoritsas@gmail.com))**

**Supplementary File 2.****Characteristics of all 9451 recommendations in UpToDate: certainty effect estimates and clinical fields**

|                                            | N (%)             | % of Strong Rec | % of strong rec discordant | % of any rec being discordant |
|--------------------------------------------|-------------------|-----------------|----------------------------|-------------------------------|
| <b><i>Clinical Fields</i></b>              |                   |                 |                            |                               |
| 1 Primary Care & General Internal Medicine | 356 (3.8)         | 22.5            | 16.3                       | 3.7                           |
| 2 Emergency Medicine                       | 295 (3.1)         | 25.1            | <b>23.0</b>                | <b>5.8</b>                    |
| 3 Critical Care                            | 144 (1.5)         | 34.0            | 10.2                       | 3.5                           |
| 4 Cardiovascular Medicine                  | 529 (5.6)         | <b>42.7</b>     | 5.3                        | 2.3                           |
| 5 Infectious Diseases                      | 870 (9.2)         | <b>41.3</b>     | <b>19.5</b>                | <b>8.0</b>                    |
| 6 Nephrology and Hypertension              | 475 (5.0)         | <b>39.8</b>     | 6.3                        | 2.5                           |
| 7 Pulmonary Medicine                       | 347 (3.7)         | 34.6            | 6.7                        | 2.3                           |
| 8 Hematology (non-oncology)                | 192 (2.0)         | <b>41.1</b>     | <b>26.6</b>                | <b>10.9</b>                   |
| 9 Neurology                                | 395 (4.2)         | 31.1            | <b>17.9</b>                | <b>5.6</b>                    |
| 10 Allergy and Immunology                  | 261 (2.8)         | 23.4            | 3.3                        | 0.8                           |
| 11 Endocrinology & Diabetes                | 504 (5.3)         | 19.0            | 6.3                        | 1.2                           |
| 12 Gastroenterology & Hepatology           | 471 (5.0)         | 22.9            | 7.4                        | 1.7                           |
| 13 Rheumatology                            | 216 (2.3)         | 21.3            | 4.3                        | 0.9                           |
| 14 Palliative Care                         | 33 (0.3)          | 18.2            | 0.0                        | 0.0                           |
| 15 Oncology                                | 1255 (13.3)       | <b>36.0</b>     | 7.7                        | 2.8                           |
| 16 Hemato-oncology                         | 263 (2.8)         | 27.8            | <b>20.5</b>                | <b>5.7</b>                    |
| 17 Pediatrics                              | 1057 (11.2)       | <b>39.5</b>     | <b>17.7</b>                | <b>7.0</b>                    |
| 18 Pediatric Emergency Medicine            | 126 (1.3)         | 28.6            | 5.6                        | 1.6                           |
| 19 Gynecology & Obstetrics                 | 709 (7.5)         | 22.3            | 12.0                       | 2.7                           |
| 20 General Surgery                         | 403 (4.3)         | <b>32.8</b>     | 12.1                       | 4.0                           |
| 21 Anesthesiology                          | 48 (0.5)          | 16.7            | <b>37.5</b>                | <b>6.3</b>                    |
| 22 Dermatology                             | 240 (2.5)         | 5.8             | 0.0                        | 0.0                           |
| 23 Psychiatry                              | 262 (2.8)         | 16.8            | 9.1                        | 1.5                           |
| <b>TOTAL</b>                               | <b>9451 (100)</b> | <b>31.2</b>     | <b>12.4</b>                | <b>3.9</b>                    |
