# Supplementary material for: UpToDate adherence to GRADE criteria for strong recommendations: an analytical survey
Source: PubMed Central journal article supplement — BMJ Open. 2017 Nov 16;7(11):e018593. doi: 10.1136/bmjopen-2017-018593 (PMC5701989; doi:10.1136/bmjopen-2017-018593), 2017-11-16
Supplement: bmjopen-2017-018593supp002.pdf [file bmjopen-2017-018593supp002.pdf]

## Supplementary File 2.

### Characteristics of all 9451 recommendations in UpToDate: certainty effect estimates and clinical fields

|                                            | N (%)             | % of Strong Rec | % of strong rec discordant | % of any rec being discordant |
|--------------------------------------------|-------------------|-----------------|----------------------------|-------------------------------|
| <i>Clinical Fields</i>                     |                   |                 |                            |                               |
| 1 Primary Care & General Internal Medicine | 356 (3.8)         | 22.5            | 16.3                       | 3.7                           |
| 2 Emergency Medicine                       | 295 (3.1)         | 25.1            | <b>23.0</b>                | <b>5.8</b>                    |
| 3 Critical Care                            | 144 (1.5)         | 34.0            | 10.2                       | 3.5                           |
| 4 Cardiovascular Medicine                  | 529 (5.6)         | <b>42.7</b>     | 5.3                        | 2.3                           |
| 5 Infectious Diseases                      | 870 (9.2)         | <b>41.3</b>     | <b>19.5</b>                | <b>8.0</b>                    |
| 6 Nephrology and Hypertension              | 475 (5.0)         | <b>39.8</b>     | 6.3                        | 2.5                           |
| 7 Pulmonary Medicine                       | 347 (3.7)         | 34.6            | 6.7                        | 2.3                           |
| 8 Hematology (non-oncology)                | 192 (2.0)         | <b>41.1</b>     | <b>26.6</b>                | <b>10.9</b>                   |
| 9 Neurology                                | 395 (4.2)         | 31.1            | <b>17.9</b>                | <b>5.6</b>                    |
| 10 Allergy and Immunology                  | 261 (2.8)         | 23.4            | 3.3                        | 0.8                           |
| 11 Endocrinology & Diabetes                | 504 (5.3)         | 19.0            | 6.3                        | 1.2                           |
| 12 Gastroenterology & Hepatology           | 471 (5.0)         | 22.9            | 7.4                        | 1.7                           |
| 13 Rheumatology                            | 216 (2.3)         | 21.3            | 4.3                        | 0.9                           |
| 14 Palliative Care                         | 33 (0.3)          | 18.2            | 0.0                        | 0.0                           |
| 15 Oncology                                | 1255 (13.3)       | <b>36.0</b>     | 7.7                        | 2.8                           |
| 16 Hemato-oncology                         | 263 (2.8)         | 27.8            | <b>20.5</b>                | <b>5.7</b>                    |
| 17 Pediatrics                              | 1057 (11.2)       | <b>39.5</b>     | <b>17.7</b>                | <b>7.0</b>                    |
| 18 Pediatric Emergency Medicine            | 126 (1.3)         | 28.6            | 5.6                        | 1.6                           |
| 19 Gynecology & Obstetrics                 | 709 (7.5)         | 22.3            | 12.0                       | 2.7                           |
| 20 General Surgery                         | 403 (4.3)         | <b>32.8</b>     | 12.1                       | 4.0                           |
| 21 Anesthesiology                          | 48 (0.5)          | 16.7            | <b>37.5</b>                | <b>6.3</b>                    |
| 22 Dermatology                             | 240 (2.5)         | 5.8             | 0.0                        | 0.0                           |
| 23 Psychiatry                              | 262 (2.8)         | 16.8            | 9.1                        | 1.5                           |
| <b>TOTAL</b>                               | <b>9451 (100)</b> | <b>31.2</b>     | <b>12.4</b>                | <b>3.9</b>                    |
